# Supplementary material for: Synthesis and molecular structural studies of racemic chiral-at-vanadium(v) complexes using an unsymmetric achiral phenolic bidentate ligand
Source: Royal Society of Chemistry journal article supplement (doi:10.1039/d2dt03436k), 2023-01-01
Supplement: d2dt03436k1.pdf [file d2dt03436k1.pdf]

## Electronic Supporting Information (ESI)

### Synthesis and Molecular Structural Studies of Racemic Chiral-at-Vanadium(V) Complexes Using an Unsymmetric Achiral Phenolic Bidentate Ligand

Koichi Nagata,<sup>1,2</sup> Ayako Hino,<sup>1</sup> Hitoshi Ube,<sup>1</sup> Hiroyasu Sato<sup>3</sup> and Mitsuhiko Shionoya<sup>1\*</sup>

<sup>1</sup>Department of Chemistry, Graduate School of Science, The University of Tokyo, 7-3-1 Hongo,  
Bunkyo-ku, Tokyo 113-0033, Japan

<sup>2</sup>Current address: Department of Chemistry, Graduate School of Science, Tohoku University,  
Aoba-ku, Sendai, Miyagi 980-8578, Japan.

<sup>3</sup>Rigaku Corporation, 3-9-12 Matsubara-cho, Akishima, Tokyo 196-8666, Japan.

To whom correspondence should be addressed.

shionoya@chem.s.u-tokyo.ac.jp

### Synthesis of 2-adamantyl-4-*tert*-butyl-6-(3,5-di-*tert*-butyl-2-hydroxybenzyl)phenol (H<sub>2</sub>L)

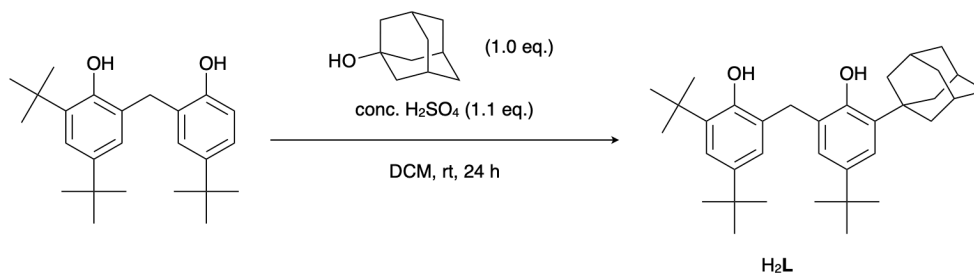

All the procedures were performed under an inert gas atmosphere. 2,4-Di-*tert*-butyl-6-(5-*tert*-butyl-2-hydroxybenzyl)phenol (97.8 mg, 266  $\mu$ mol, 1.0 eq.) and 1-adamantanol (40.6 mg, 267  $\mu$ mol, 1.0 eq.) were dissolved in dry dichloromethane (10 mL). Conc. sulfuric acid (15.0  $\mu$ L, 281  $\mu$ mol, 1.1 eq.) was added and the solution was stirred at room temperature for 24 h. The resultant red-brown solution was washed with water (10 mL) and dichloromethane (5 mL) was added. The aqueous layer was extracted with dichloromethane (5 mL  $\times$  3) and the combined organic layer was dried over sodium sulfate. After removing the solvent, H<sub>2</sub>L was obtained as brown paste (103 mg, 205  $\mu$ mol, 77% yield). The paste was crystallized from *n*-hexane at  $-20$   $^{\circ}$ C to afford microcrystalline powder (32.1 mg, 63.6  $\mu$ mol, 24% yield). <sup>1</sup>H NMR (500 MHz; CDCl<sub>3</sub>):  $\delta$  7.19 (d,  $J$  = 2.4 Hz, 1H), 7.14 (m, 3H), 5.92 (s, 1H), 5.85 (s, 1H), 3.92 (s, 2H), 2.10 (m, 9H), 1.78 (s, 6H), 1.41 (s, 9H), 1.28 (s, 18H).; <sup>13</sup>C NMR (126 MHz; CDCl<sub>3</sub>):  $\delta$  150.22, 150.11, 143.3, 143.0, 135.8, 135.6, 126.29, 126.21, 125.32, 125.12, 122.7, 41.2, 37.16, 37.06, 34.8, 34.48, 34.42, 32.7, 31.7, 30.2, 29.2; ESI-TOF-MS (low resolution, positive-mode, solvent: CHCl<sub>3</sub>/MeOH):  $m/z$  calcd. for ([H<sub>2</sub>L $\cdot$ Na]<sup>+</sup>) [C<sub>35</sub>H<sub>50</sub>O<sub>2</sub>Na<sup>23</sup>]<sup>+</sup>: 525.37; found: 525.37.

## NMR spectra of H<sub>2</sub>L

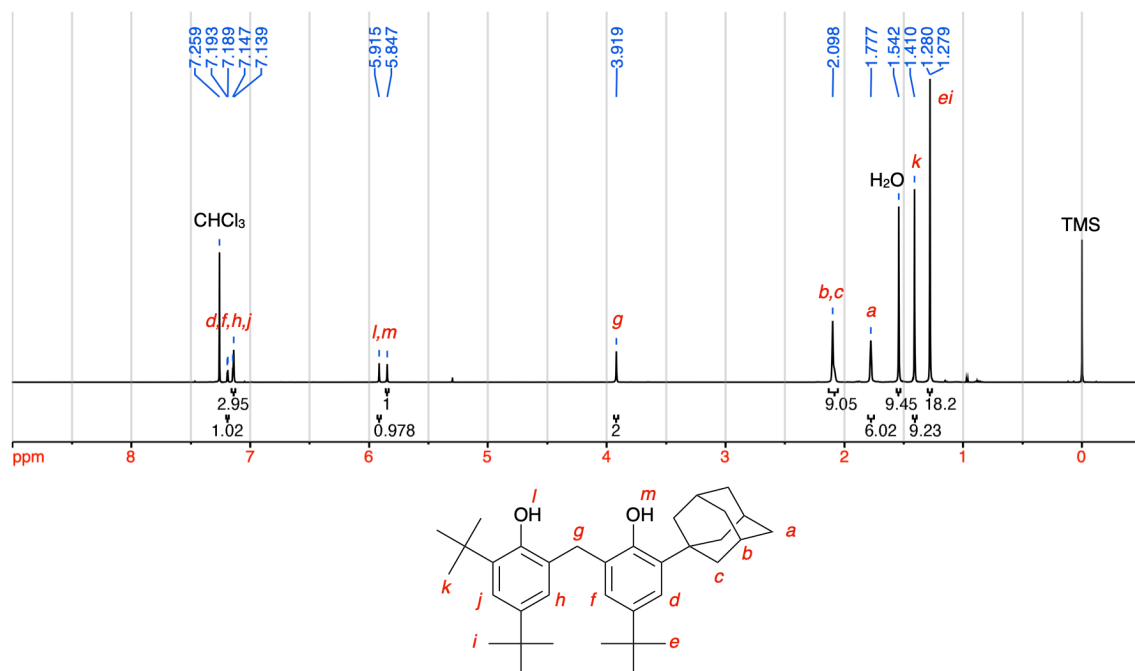

**Fig. S1** <sup>1</sup>H NMR spectrum of H<sub>2</sub>L (500 MHz, CDCl<sub>3</sub>, 300 K).

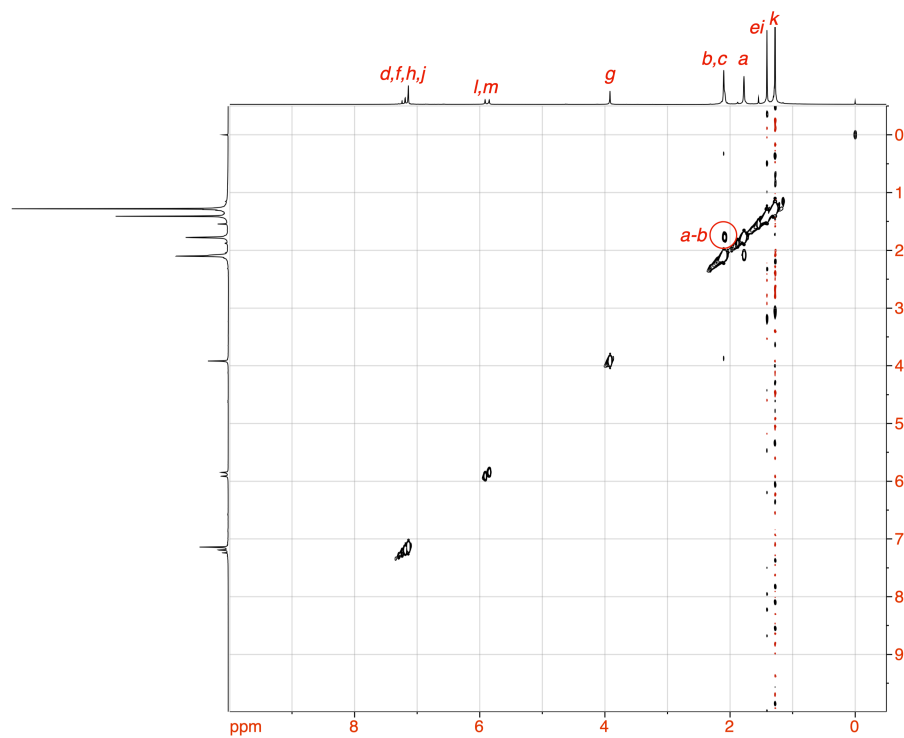

**Fig. S2** <sup>1</sup>H-<sup>1</sup>H COSY NMR spectrum of H<sub>2</sub>L (500 MHz, CDCl<sub>3</sub>, 300 K).

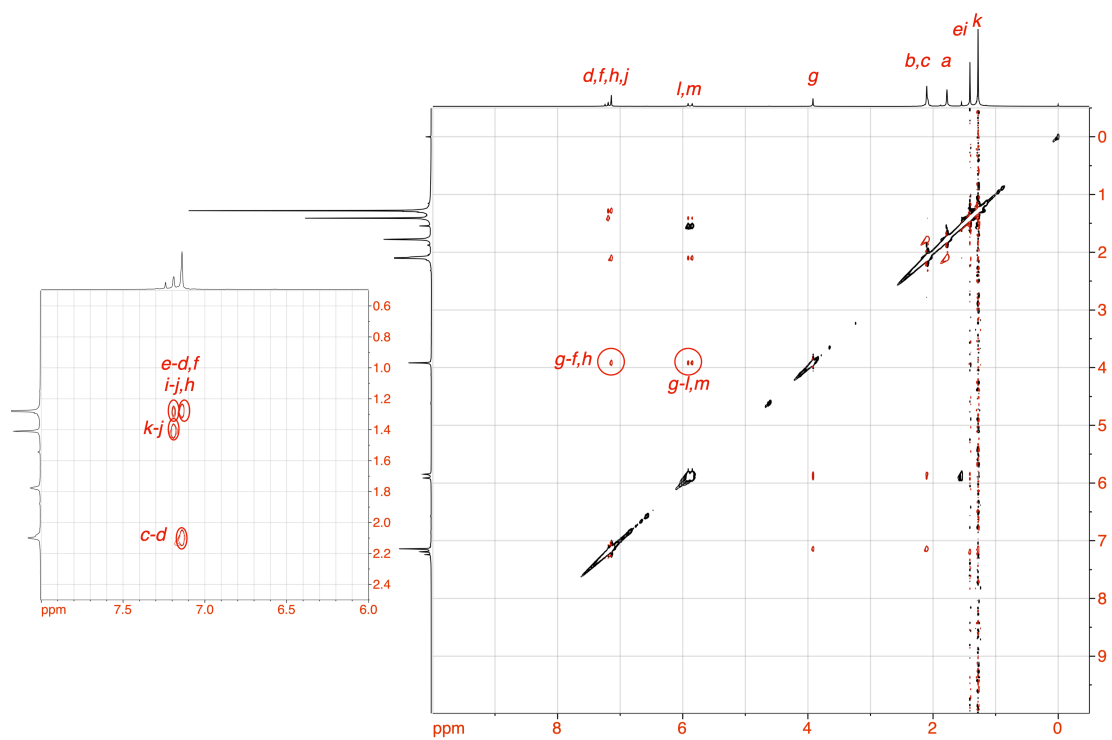

**Fig. S3**  $^1\text{H}$ - $^1\text{H}$  NOESY NMR spectrum of  $\text{H}_2\text{L}$  (500 MHz,  $\text{CDCl}_3$ , 300 K).

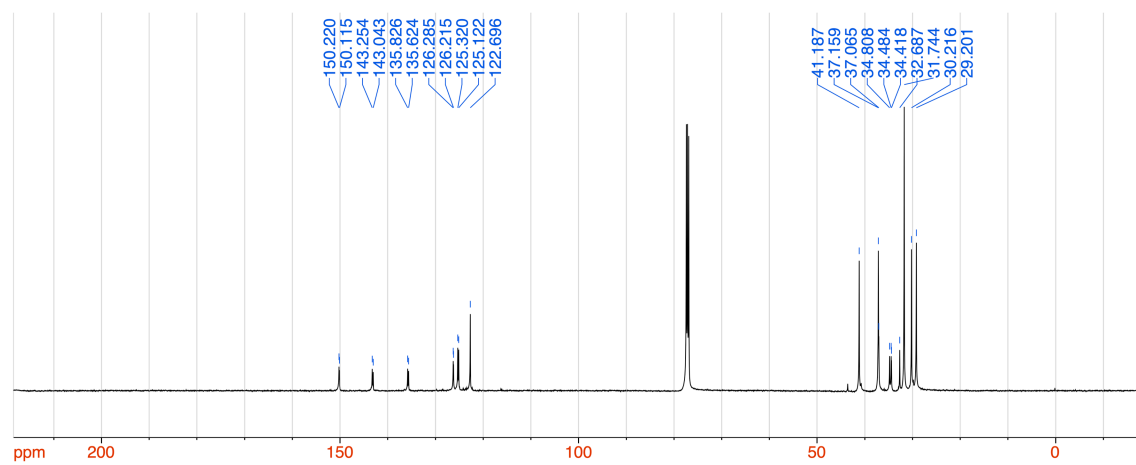

**Fig. S4**  $^{13}\text{C}\{^1\text{H}\}$  NMR spectrum of  $\text{H}_2\text{L}$  (126 MHz,  $\text{CDCl}_3$ , 300 K).

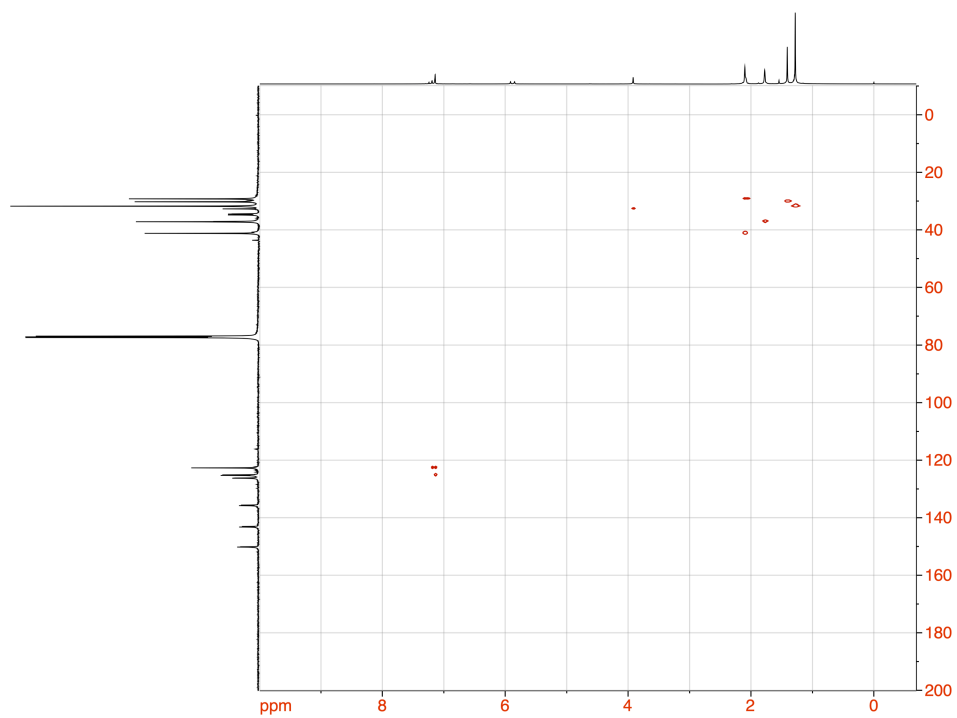

**Fig. S5** HSQC NMR spectrum of H<sub>2</sub>L (<sup>1</sup>H: 500 MHz, <sup>13</sup>C: 126 MHz, CDCl<sub>3</sub>, 300 K).

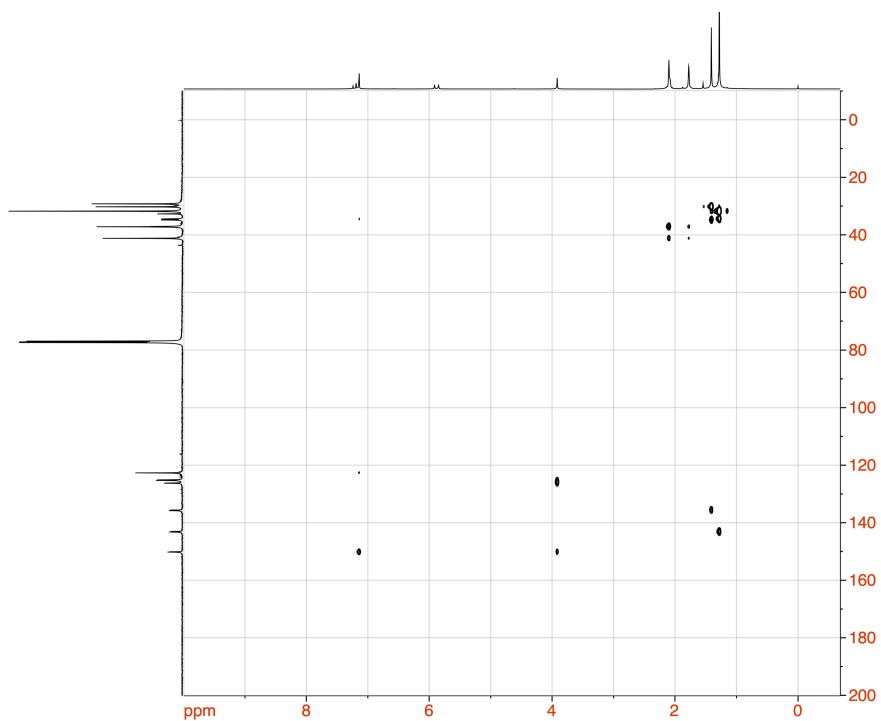

**Fig. S6** HMBC NMR spectrum of H<sub>2</sub>L (<sup>1</sup>H: 500 MHz, <sup>13</sup>C: 126 MHz, CDCl<sub>3</sub>, 300 K).

**NMR spectra of [V(O)(O*t*-Bu)L] (**1**): complexation of H<sub>2</sub>L with V(O)(O*t*-Bu)<sub>3</sub>**

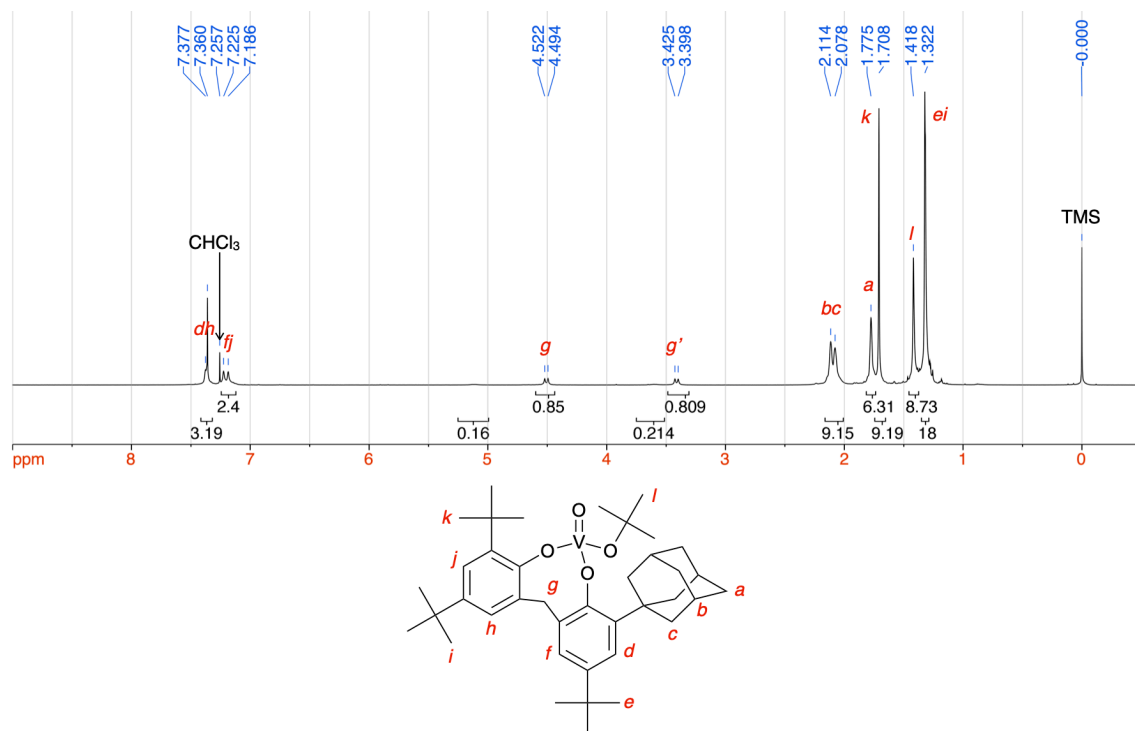

**Fig. S7** <sup>1</sup>H NMR spectrum of **1** (500 MHz, CDCl<sub>3</sub>, 300 K). According to DFT calculations, the major and minor signals may correspond to conformers I and II of the eight-membered ring, respectively.

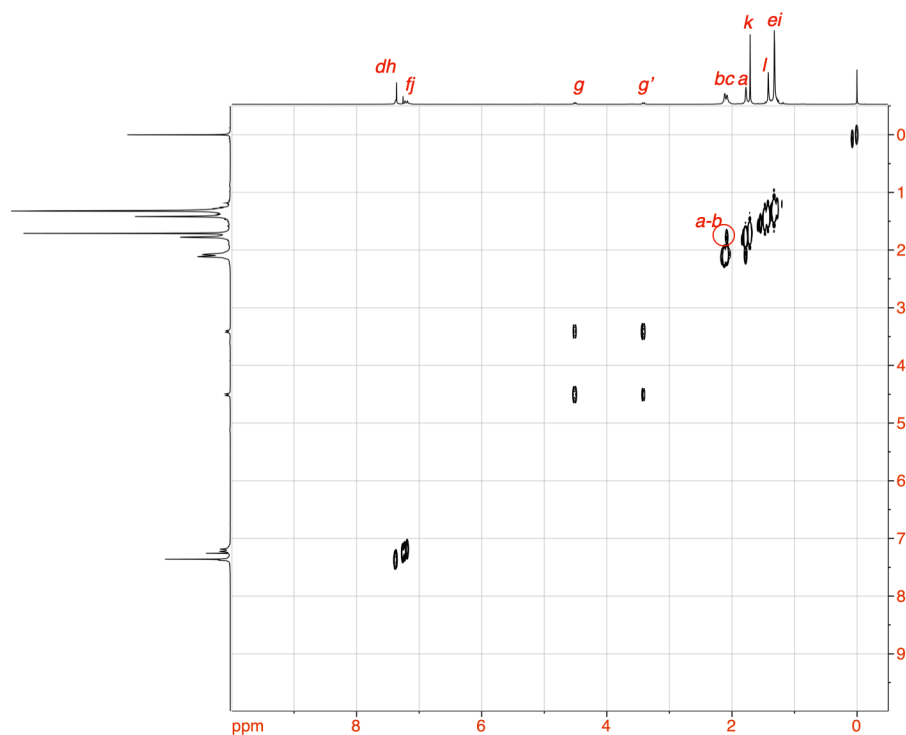

**Fig. S8** <sup>1</sup>H-<sup>1</sup>H COSY NMR spectrum of **1** (500 MHz, CDCl<sub>3</sub>, 300 K).

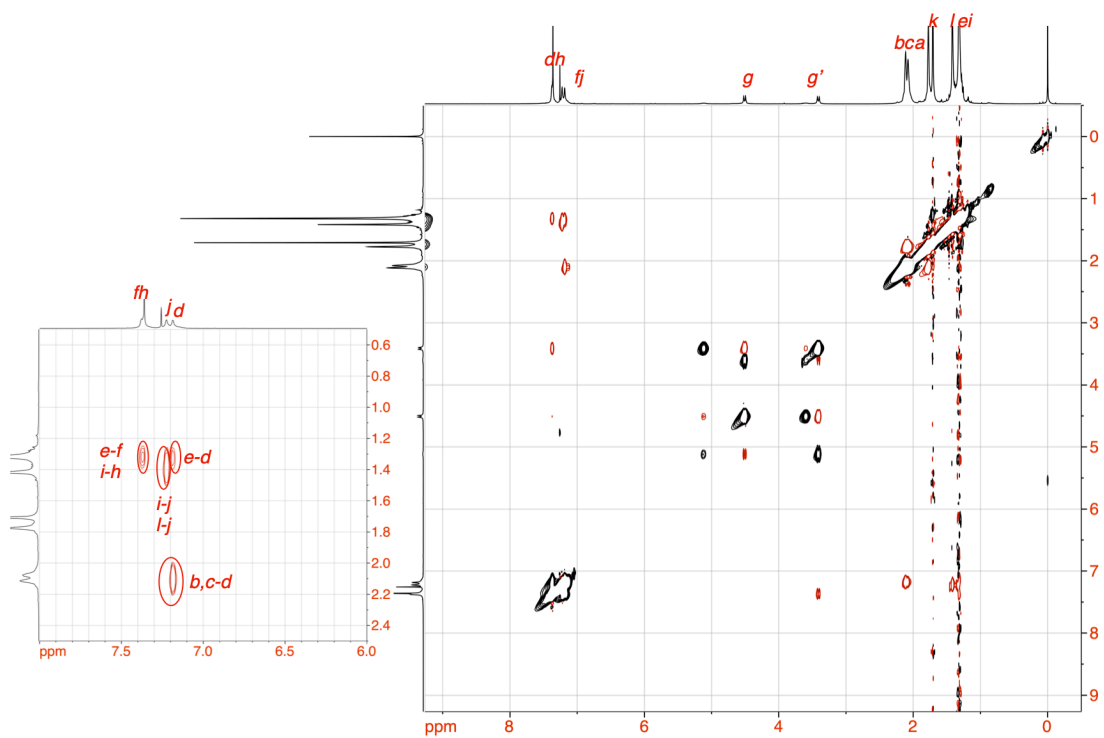

**Fig. S9**  $^1\text{H}$ - $^1\text{H}$  NOESY NMR spectrum of **1** (500 MHz,  $\text{CDCl}_3$ , 300 K).

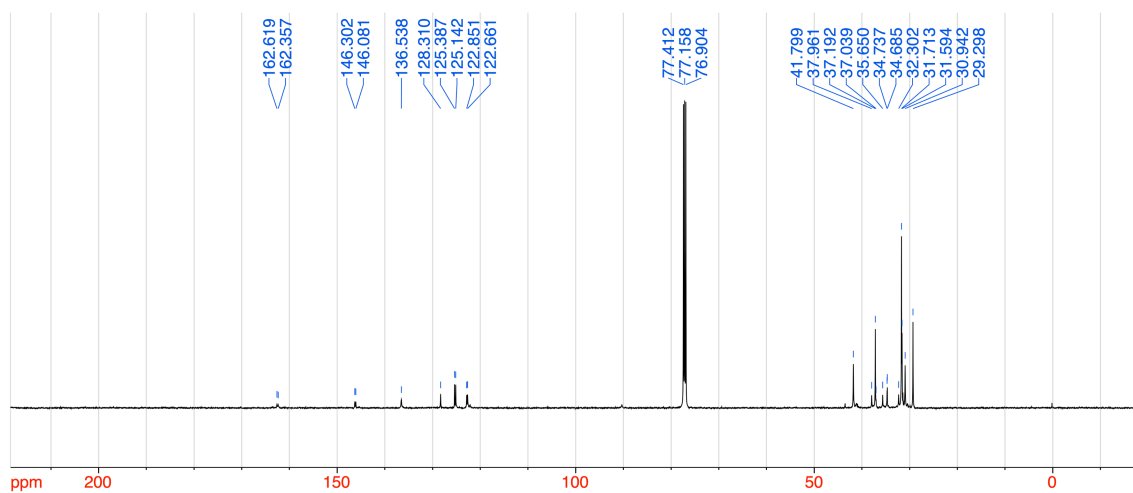

**Fig. S10**  $^{13}\text{C}\{^1\text{H}\}$  NMR spectrum of **1** (126 MHz,  $\text{CDCl}_3$ , 300 K).

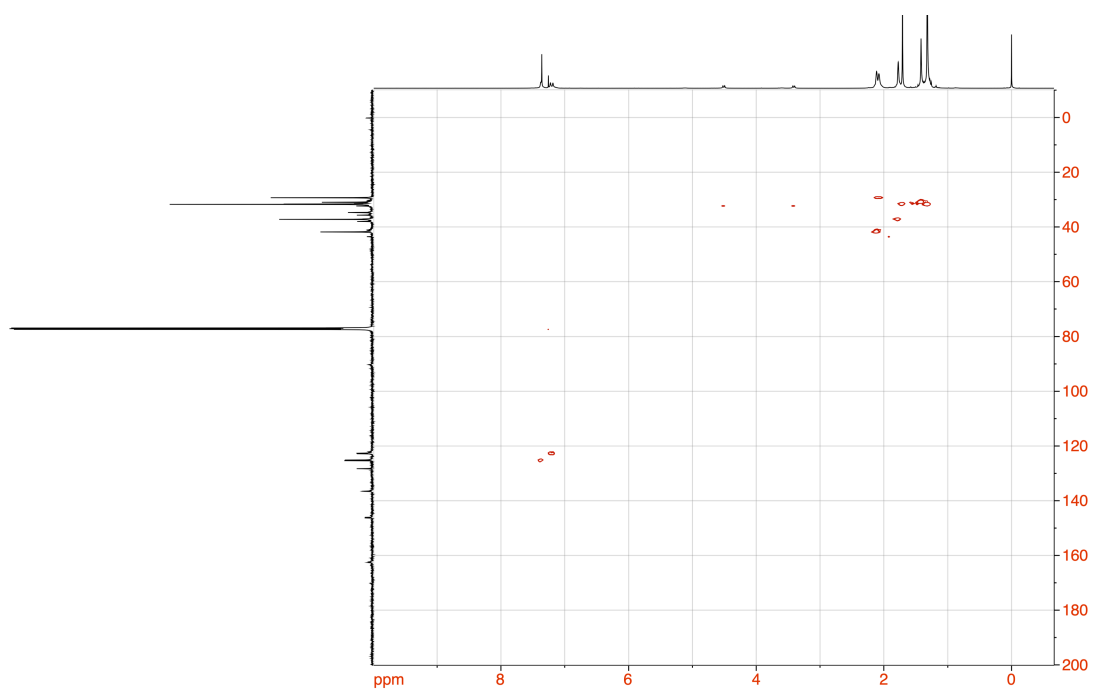

**Fig. S11** HSQC NMR spectrum of **1** ( $^1\text{H}$ : 500 MHz,  $^{13}\text{C}$ : 126 MHz,  $\text{CDCl}_3$ , 300 K).

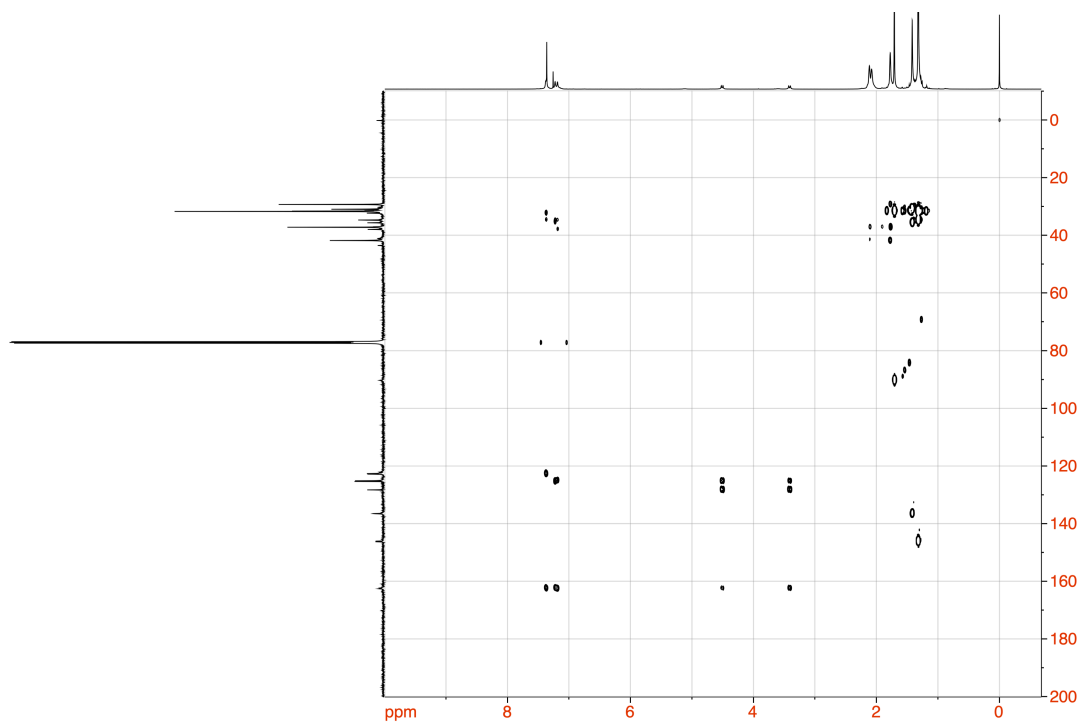

**Fig. S12** HMBC NMR spectrum of **1** ( $^1\text{H}$ : 500 MHz,  $^{13}\text{C}$ : 126 MHz,  $\text{CDCl}_3$ , 300 K).



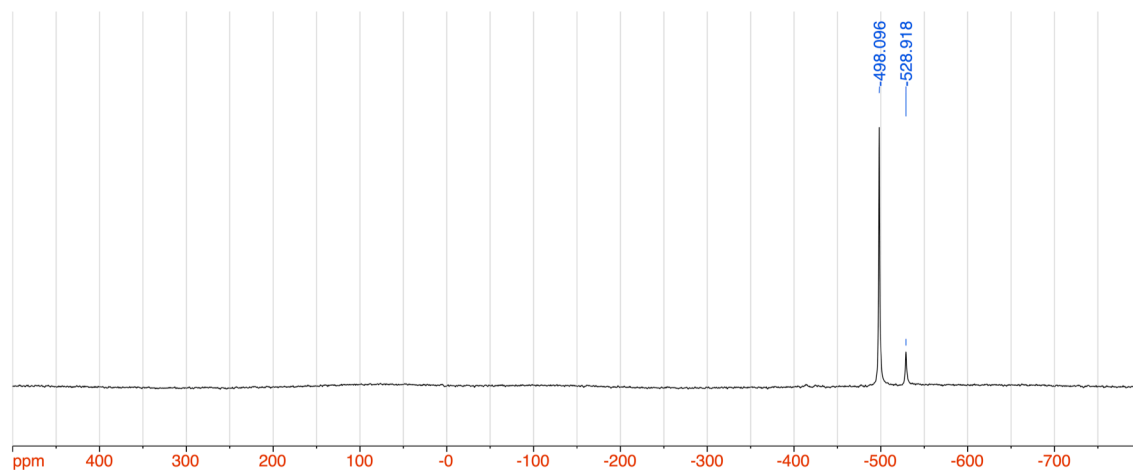

**Fig. S13**  $^{51}\text{V}$  NMR spectrum of **1** (132 MHz,  $\text{CDCl}_3$ , 300 K). According to DFT calculations, the major and minor signals may correspond to conformers I and II of the eight-membered ring, respectively.

NMR Spectra of [V(O)CIL] (2): complexation of H<sub>2</sub>L with V(O)Cl<sub>3</sub>

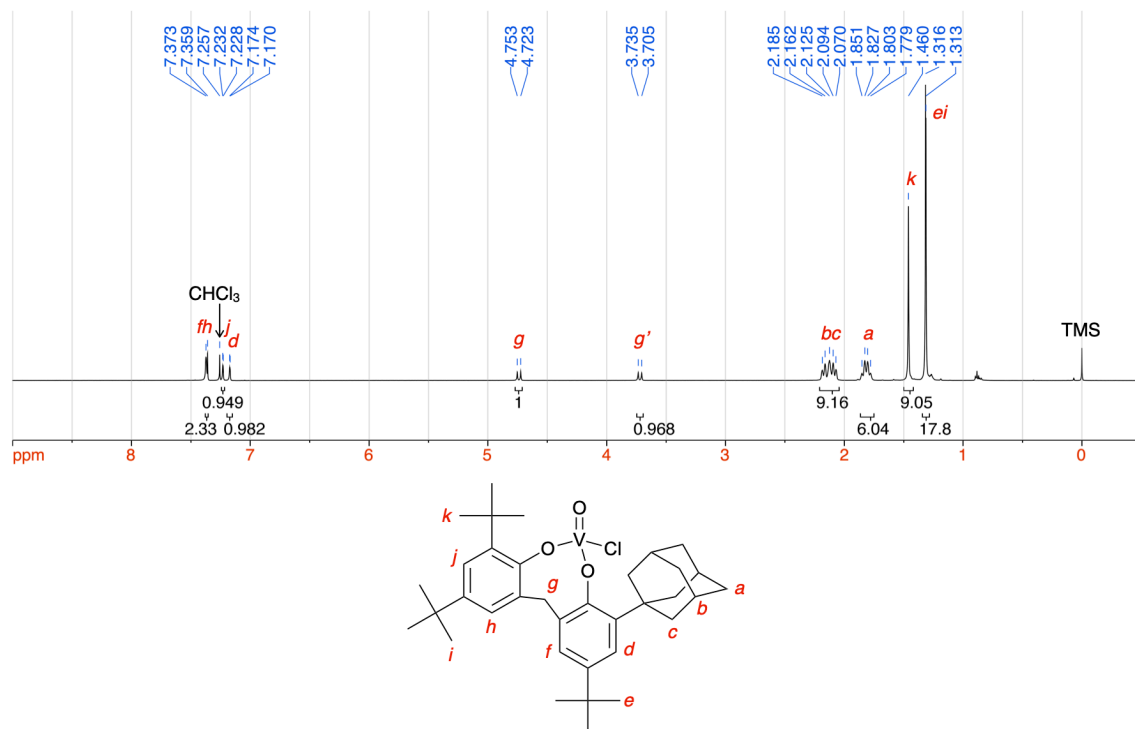

Fig. S14 <sup>1</sup>H NMR spectrum of **2** (500 MHz, CDCl<sub>3</sub>, 300 K).

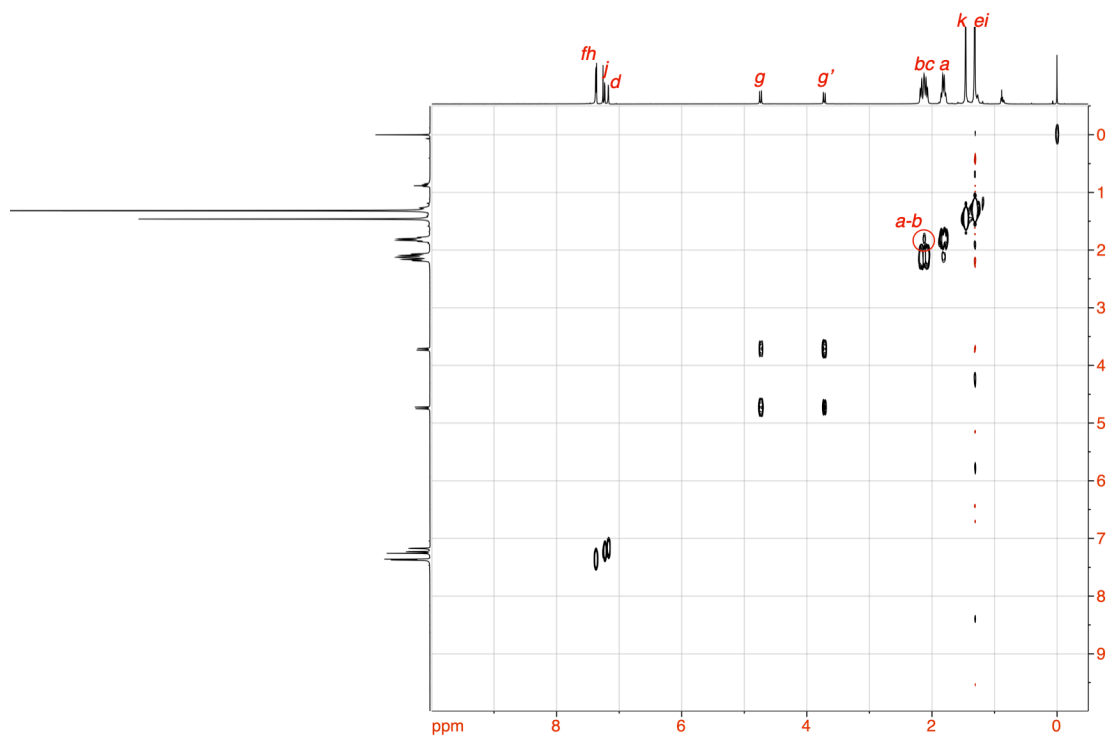

Fig. S15 <sup>1</sup>H-<sup>1</sup>H COSY NMR spectrum of **2** (500 MHz, CDCl<sub>3</sub>, 300 K).

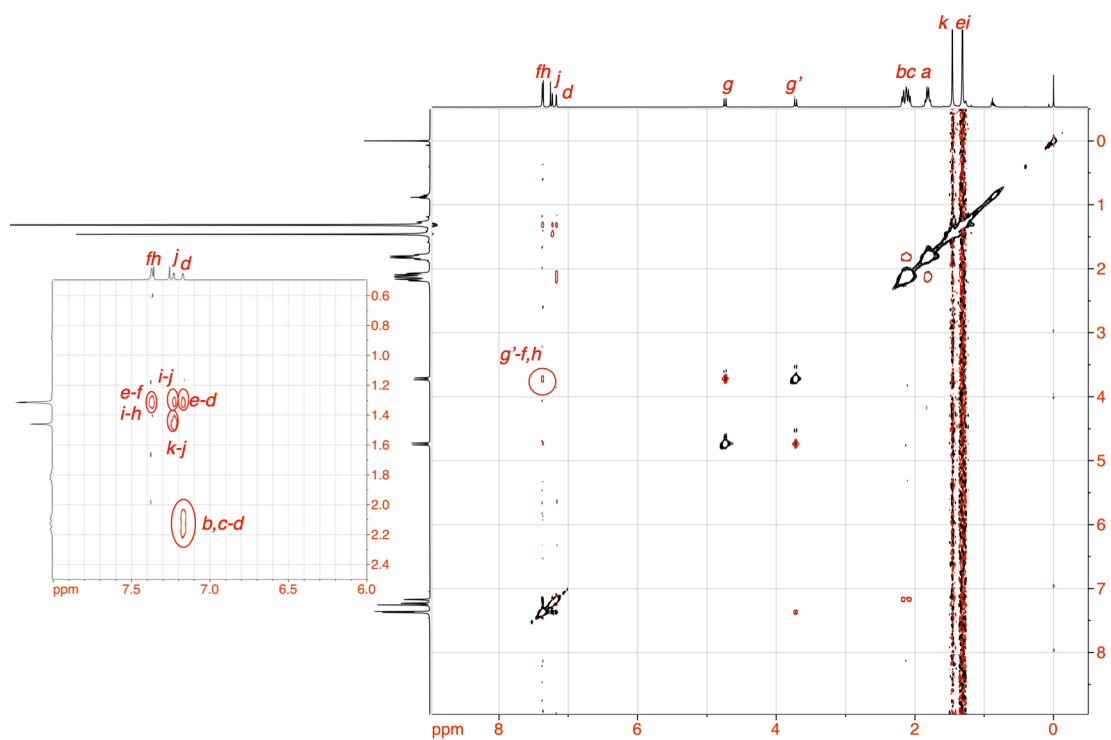

**Fig. S16**  $^1\text{H}$ - $^1\text{H}$  NOESY NMR spectrum of **2** (500 MHz,  $\text{CDCl}_3$ , 300 K).

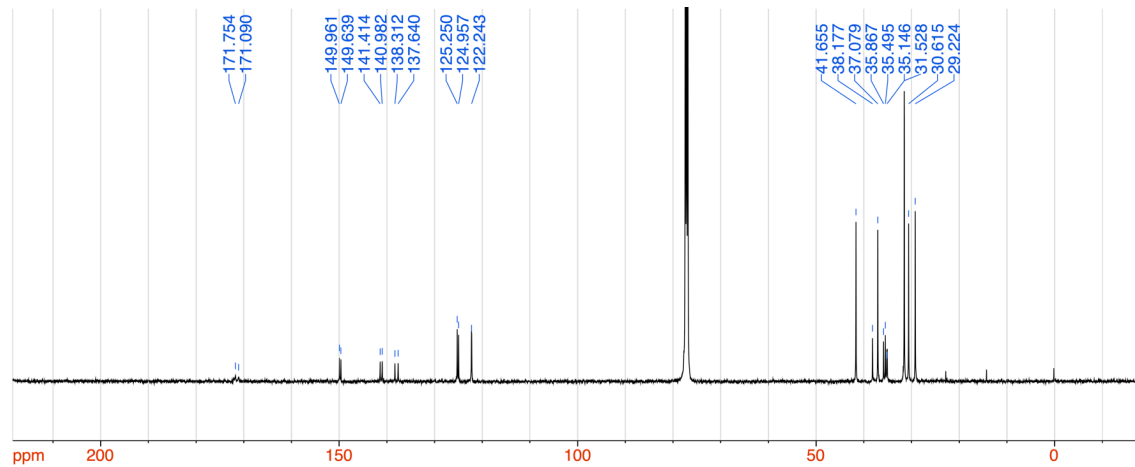

**Fig. S17**  $^{13}\text{C}\{^1\text{H}\}$  NMR spectrum of **2** ( $\text{CDCl}_3$ , 300 K, 126 MHz).

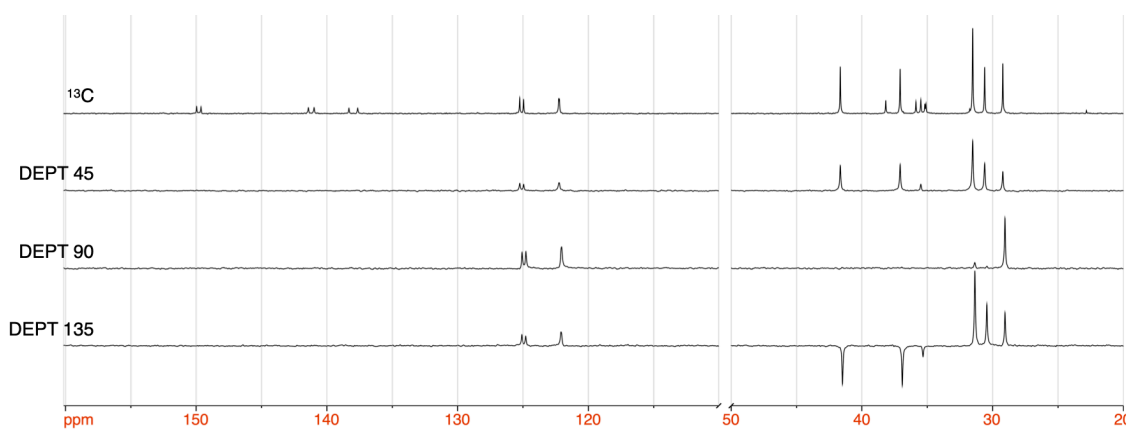

**Fig. S18** DEPT 135, 90, 45, and  $^{13}\text{C}\{^1\text{H}\}$  NMR spectrum of **2** (126 MHz,  $\text{CDCl}_3$ , 300 K).

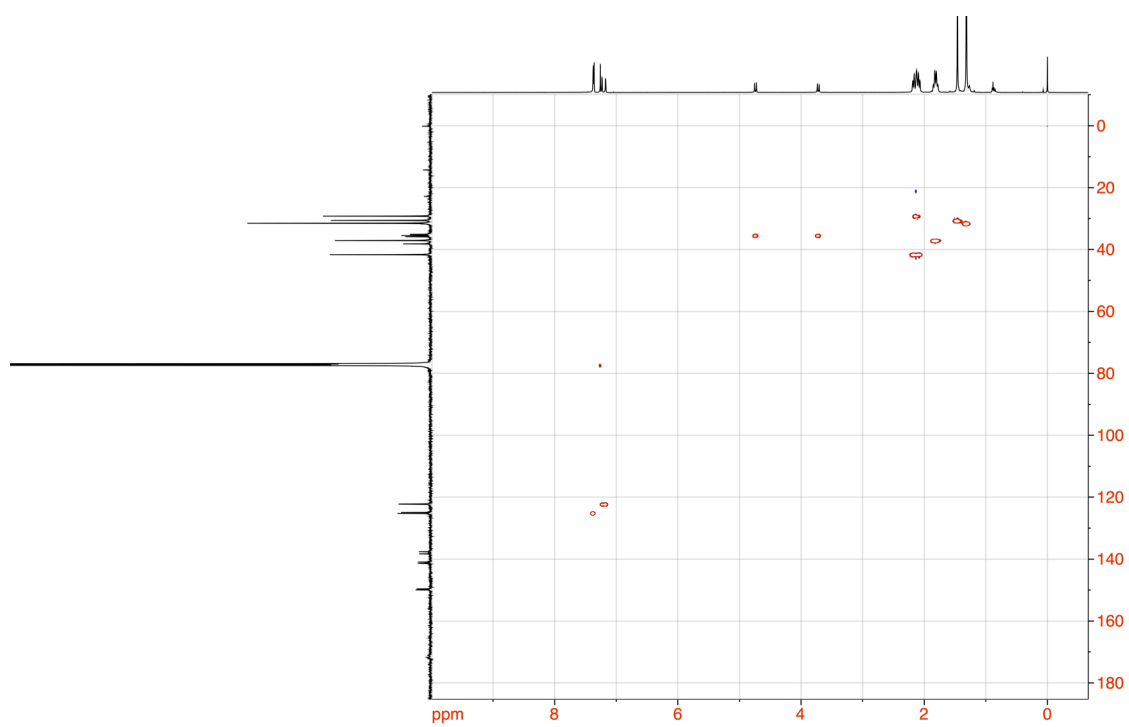

**Fig. S19** HSQC NMR spectrum of **2** ( $^1\text{H}$ : 500 MHz,  $^{13}\text{C}$ : 126 MHz,  $\text{CDCl}_3$ , 300 K).

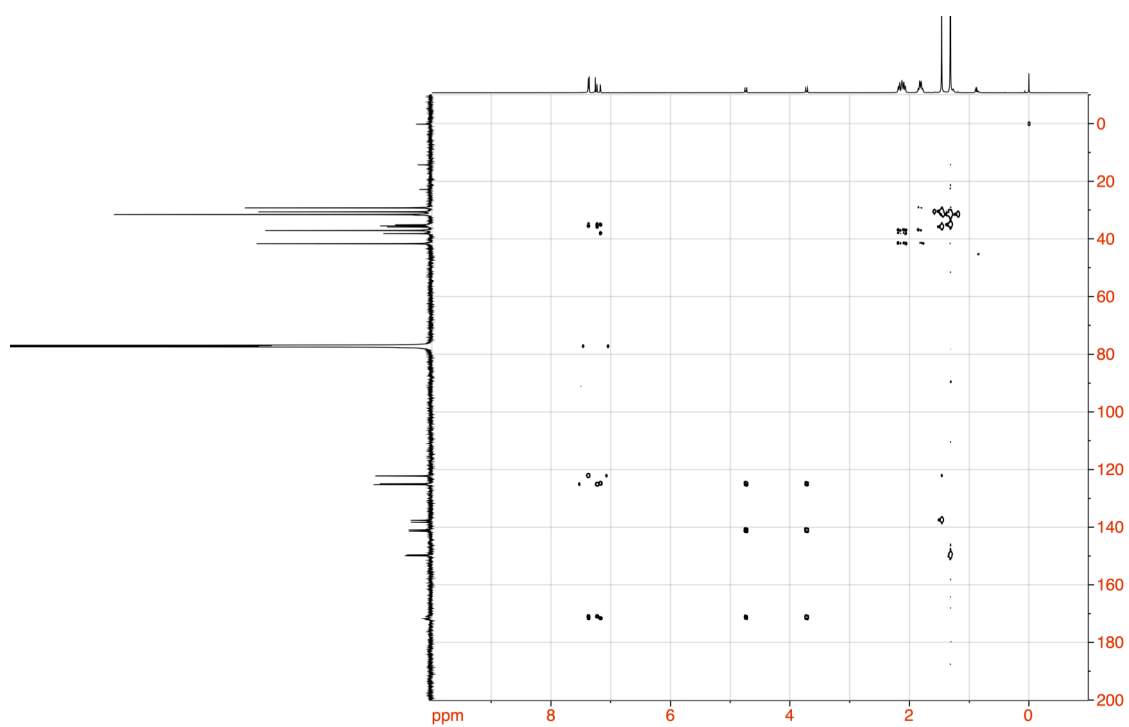

**Fig. S20** HMBC NMR spectrum of **2** ( $^1\text{H}$ : 500 MHz,  $^{13}\text{C}$ : 126 MHz,  $\text{CDCl}_3$ , 300 K).

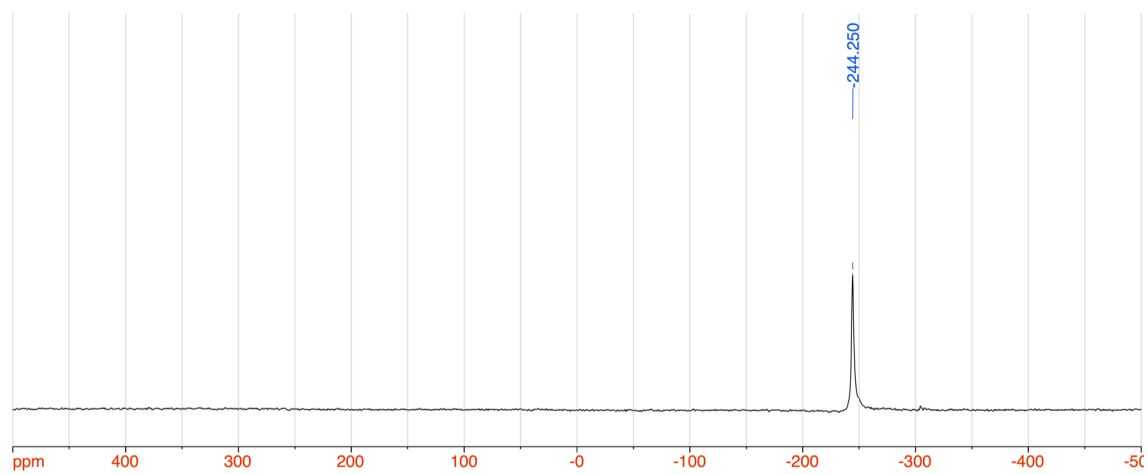

**Fig. S21**  $^{51}\text{V}$  NMR spectrum of **2** (132 MHz,  $\text{CDCl}_3$ , 300 K).

**Synthesis of [V(O)(*Ot*-Bu)L'] (**3**): complexation of H<sub>2</sub>L' with V(O)(*Ot*-Bu)<sub>3</sub> (H<sub>2</sub>L' = 6,6'-methylenebis(2,4-di-*tert*-butylphenol))**

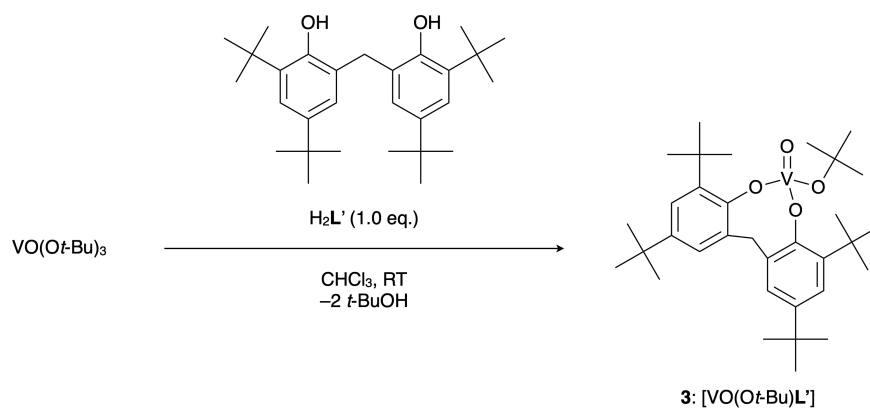

V(O)(*Ot*-Bu)<sub>3</sub> (2.2 mg, 7.3 μmol, 1.0 eq.) and H<sub>2</sub>L' (3.1 mg, 7.3 μmol, 1.0 eq.) were mixed in 1 mL of CHCl<sub>3</sub> and the resultant solution was stirred at room temperature for 10 min. The solvent and *t*-BuOH generated were then removed by evaporation, 1 mL of CHCl<sub>3</sub> was added again and the solution was stirred at room temperature for 24 h. The solution was filtered through a glass fibre filter paper and the solvent was removed by evaporation to afford **3** as a brown solid (3.7 mg, 6.8 μmol, 93% yield). <sup>1</sup>H NMR (500 MHz, CDCl<sub>3</sub>): δ 7.38 (s, 2H), 7.24 (s, 2H), 4.52 (d, *J* = 13.7 Hz, 1H), 3.41 (d, *J* = 13.7 Hz, 1H), 1.70 (s, 9H), 1.42 (s, 18H), 1.32 (s, 18H); <sup>13</sup>C NMR (126 MHz, CDCl<sub>3</sub>): δ 162.2, 146.2, 136.5, 128.0, 125.4, 122.8, 77.4, 77.2, 76.9, 35.7, 34.7, 32.3, 31.71, 31.57, 31.0; <sup>51</sup>V NMR (132 MHz, CDCl<sub>3</sub>): δ -500.2 (broad, *w*<sub>1/2</sub> ≈ 158 Hz).

### NMR spectra of [V(O)(*O**t*-Bu)L'] (**3**)

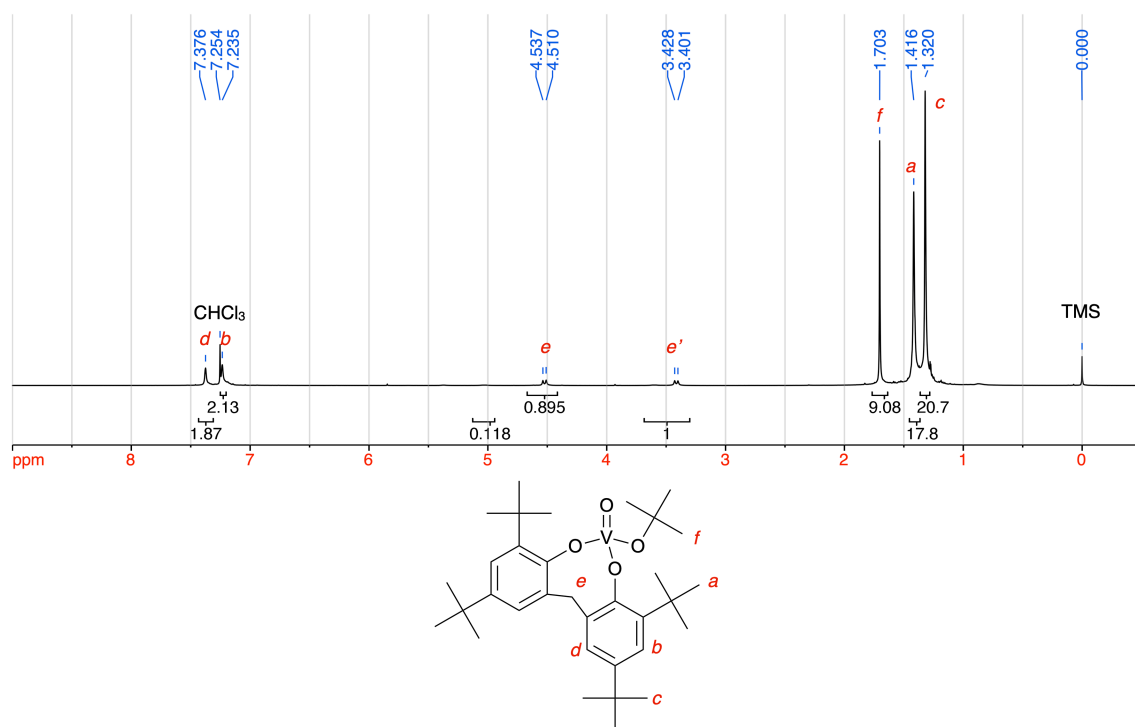

**Fig. S22**  $^1\text{H}$  NMR spectrum of **3** (500 MHz,  $\text{CDCl}_3$ , 300 K). According to DFT calculations, the major and minor signals may correspond to conformers I and II of the eight-membered ring, respectively.

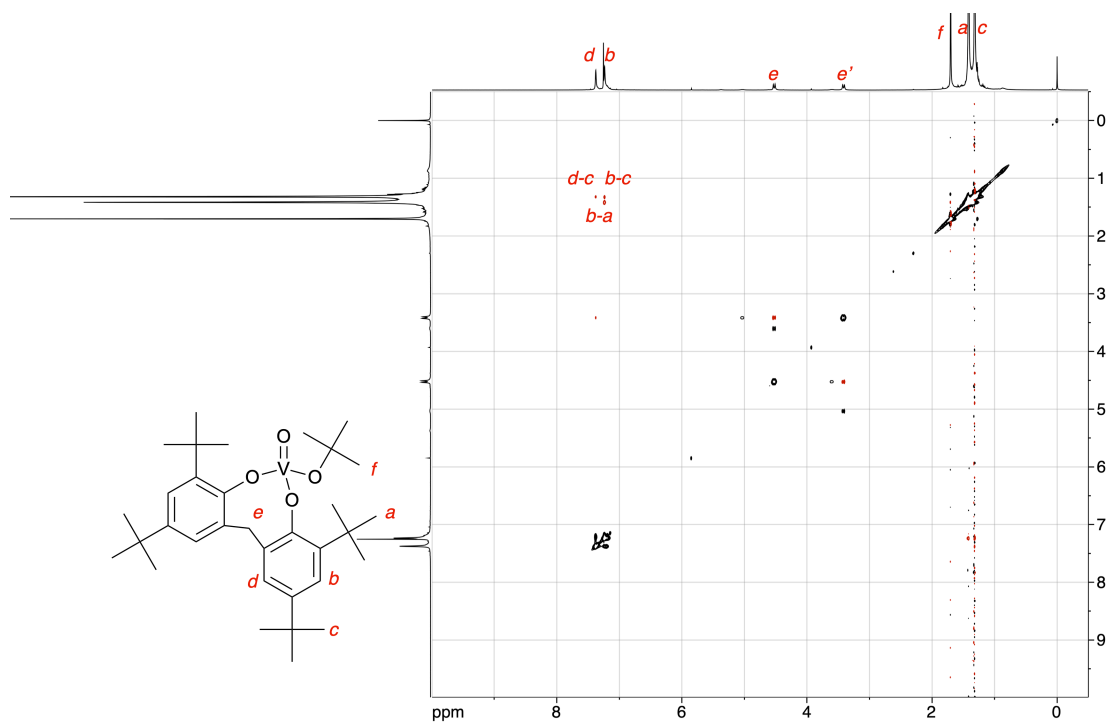

**Fig. S23**  $^1\text{H}$ - $^1\text{H}$  NOESY NMR spectrum of **3** (500 MHz,  $\text{CDCl}_3$ , 300 K).

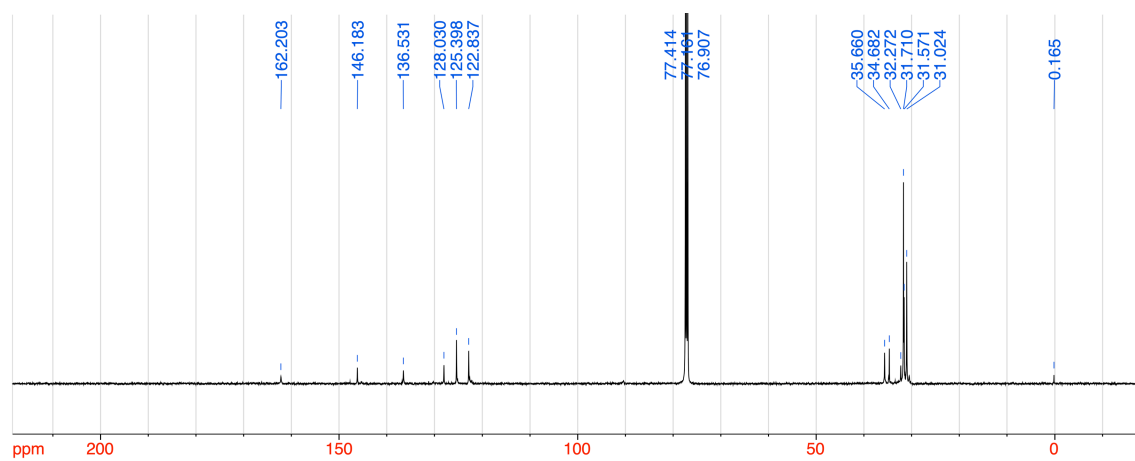

**Fig. S24**  $^{13}\text{C}\{^1\text{H}\}$  NMR spectrum of **3** ( $\text{CDCl}_3$ , 300 K, 126 MHz).

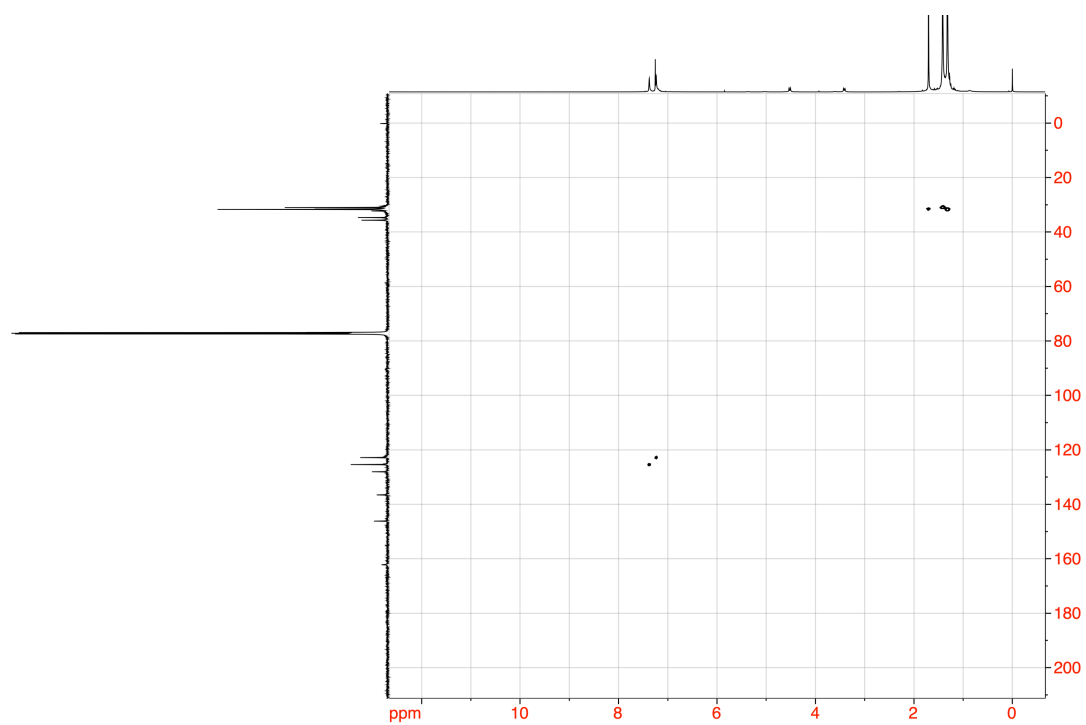

**Fig. S25** HSQC NMR spectrum of **3** ( $^1\text{H}$ : 500 MHz,  $^{13}\text{C}$ : 126 MHz,  $\text{CDCl}_3$ , 300 K).



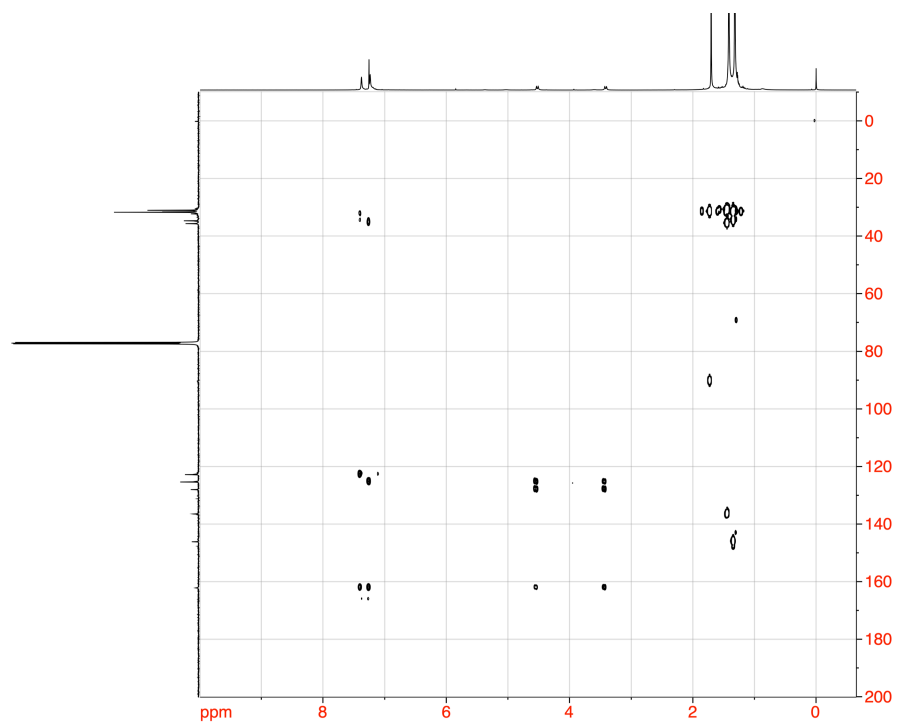

**Fig. S26** HMBC NMR spectrum of **3** ( $^1\text{H}$ : 500 MHz,  $^{13}\text{C}$ : 126 MHz,  $\text{CDCl}_3$ , 300 K).

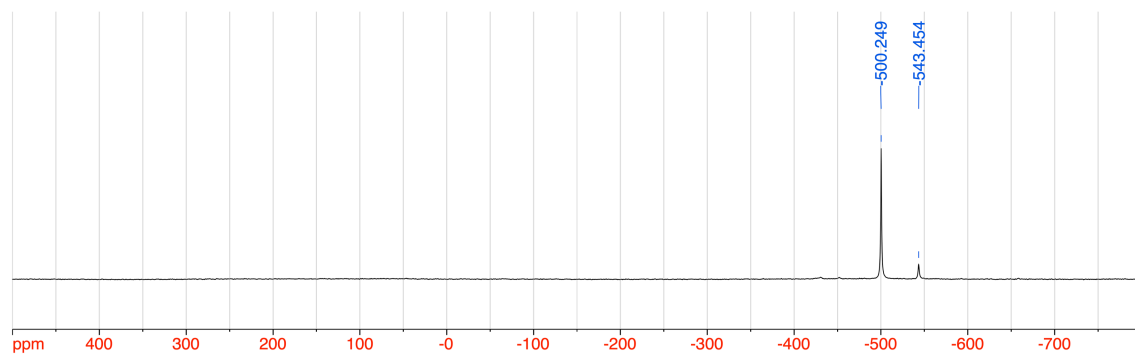

**Fig. S27**  $^{51}\text{V}$  NMR spectrum of **3** (132 MHz,  $\text{CDCl}_3$ , 300 K).

### Comparison of UV-vis spectra of **1** and **3**

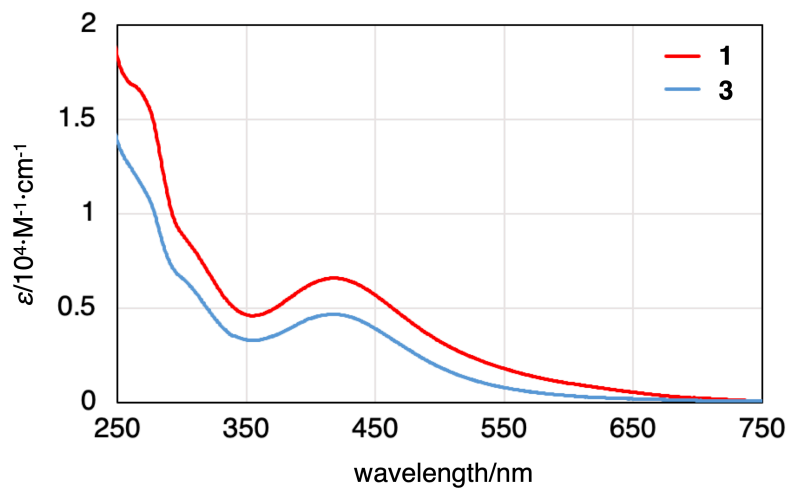

**Fig. S28** UV-vis absorption spectra of **1** (red,  $1.1 \times 10^{-3}$  M) and **3** (blue,  $3.3 \times 10^{-2}$  M) in  $\text{CHCl}_3$  (293 K).

## Computational studies

Theoretical calculations for the complexes were performed using Gaussian 16W (revision A.03 and B.01).<sup>S1</sup> The B3LYP density functional theory (DFT) with the B3LYP<sup>S2</sup>/Def2SVP<sup>S3</sup> basis sets were used to optimise the ground-state geometries of the complexes. The geometric parameters of **1** and **2** were optimised from the solid-state structures. The optimisation of the structure of **3** was based on the calculated structures of **1** and **2**. Time-dependent (TD)-DFT calculations were then performed to estimate the energies and oscillator strengths  $f$  of the 4 lowest-energy singlet and 4 triplet absorptions. In the calculations, the solvent effect of chloroform was evaluated using the Solvent Model based on Density (SMD).<sup>S4</sup> NBO calculations were performed using the NBO 5.0 program package.<sup>S5</sup> The computations of **1** and **2** were performed using the Research Centre for Computational Science, Okazaki, Japan (Project: 20-IMS-C100).

**Table S1.** Calculated singlet excited state of **1**.

| Excited State | Transition              | Energy (Wavelength)   | Oscillator Strength |
|---------------|-------------------------|-----------------------|---------------------|
| S1            | HOMO → LUMO (47.8%)     | 2.5185 eV (492.29 nm) | 0.0165              |
|               | HOMO-1 → LUMO+1 (1.1%)  |                       |                     |
| S2            | HOMO-1 → LUMO (41.3%)   | 2.6577 eV (466.51 nm) | 0.0001              |
|               | HOMO → LUMO+1 (7.9%)    |                       |                     |
| S3            | HOMO-1 → LUMO+1 (46.3%) | 2.8493 eV (435.14 nm) | 0.0822              |
|               | HOMO → LUMO (1.2%)      |                       |                     |
|               | HOMO → LUMO+1 (1.1%)    |                       |                     |
| S4            | HOMO → LUMO+1 (38.5%)   | 2.8965 eV (428.05 nm) | 0.0932              |
|               | HOMO-1 → LUMO (7.0%)    |                       |                     |
|               | HOMO-1 → LUMO+1 (1.6%)  |                       |                     |
| S5            | HOMO-2 → LUMO (49.8%)   | 3.2850 eV (377.43 nm) | 0.0010              |
| S6            | HOMO-2 → LUMO+1 (49.3%) | 3.4086 eV (363.74 nm) | 0.0006              |
| S7            | HOMO-3 → LUMO (49.4%)   | 3.4724 eV (357.06 nm) | 0.0130              |
| S8            | HOMO-3 → LUMO+1 (49.7%) | 3.5895 eV (345.40 nm) | 0.0018              |
| S9            | HOMO → LUMO+2 (49.1%)   | 3.6306 eV (341.50 nm) | 0.0179              |
| S10           | HOMO → LUMO+3 (39.0%)   | 3.7667 eV (329.16 nm) | 0.0186              |
|               | HOMO-1 → LUMO+2 (9.2%)  |                       |                     |

**Table S2.** Molecular-orbital populations of **1**.

| Molecular Orbital | Eigenvalue / eV | MO Population |            |             |                   |
|-------------------|-----------------|---------------|------------|-------------|-------------------|
|                   |                 | V             | O(bridged) | O(terminal) | Aromatic ring (L) |
| <b>LUMO+3</b>     | -1.042          | 0.50          | 0.14       | 0.09        | 0.20              |
| <b>LUMO+2</b>     | -1.342          | 0.55          | 0.10       | 0.14        | 0.08              |
| <b>LUMO+1</b>     | -2.473          | 0.61          | 0.14       | 0.08        | 0.06              |
| <b>LUMO</b>       | -2.661          | 0.61          | 0.16       | 0.02        | 0.12              |
| <b>HOMO</b>       | -5.903          | 0.05          | 0.16       | 0.00        | 0.67              |
| <b>HOMO-1</b>     | -6.167          | 0.06          | 0.14       | 0.01        | 0.65              |
| <b>HOMO-2</b>     | -6.527          | 0.00          | 0.00       | 0.00        | 0.85              |
| <b>HOMO-3</b>     | -6.726          | 0.00          | 0.00       | 0.00        | 0.82              |

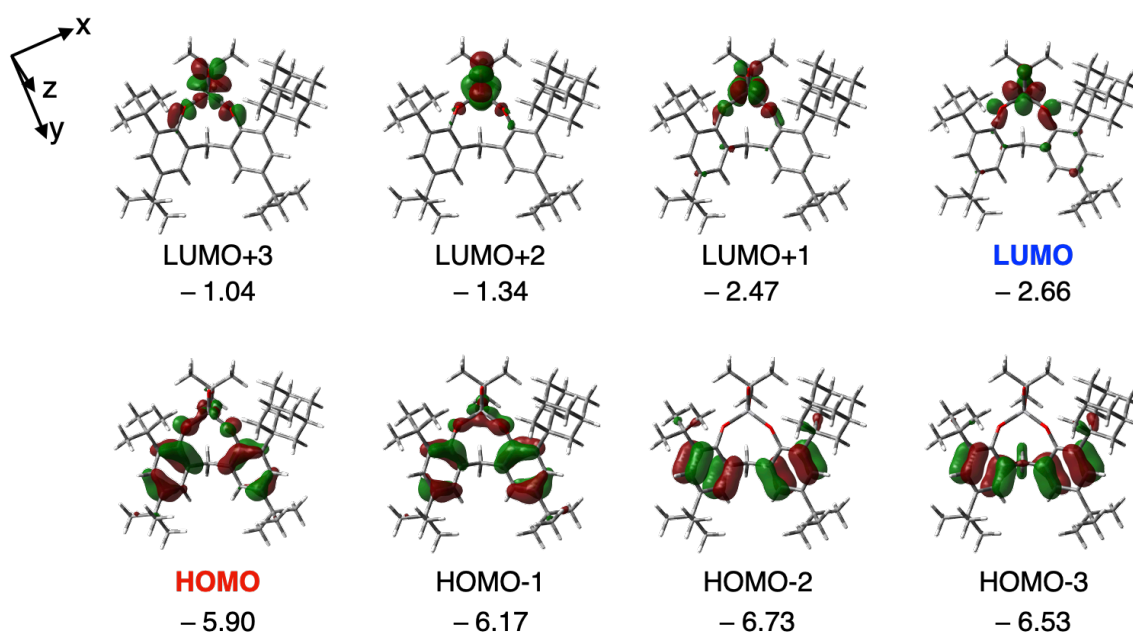

**Fig. S29** Frontier molecular orbitals of **1**.

**Table S3.** Calculated singlet excited state of **2**.

| Excited State | Transition              | Energy (Wavelength)   | Oscillator Strength |
|---------------|-------------------------|-----------------------|---------------------|
| S1            | HOMO → LUMO (45.4%)     | 2.1164 eV (585.82 nm) | 0.0333              |
|               | HOMO-1 → LUMO+1 (3.6%)  |                       |                     |
| S2            | HOMO → LUMO+1 (26.1%)   | 2.2455 eV (552.14 nm) | 0.0045              |
|               | HOMO-1 → LUMO (23.1%)   |                       |                     |
| S3            | HOMO-1 → LUMO+1 (45.1%) | 2.4824 eV (499.45 nm) | 0.1636              |
|               | HOMO → LUMO (3.6%)      |                       |                     |
| S4            | HOMO-2 → LUMO (49.1%)   | 2.8894 eV (429.09 nm) | 0.0416              |
| S5            | HOMO-2 → LUMO+1 (47.1%) | 2.9505 eV (420.22 nm) | 0.0203              |
|               | HOMO-1 → LUMO (1.3%)    |                       |                     |
|               | HOMO → LUMO+1 (1.2%)    |                       |                     |
| S6            | HOMO-1 → LUMO (21.9%)   | 3.0196 eV (410.60 nm) | 0.2589              |
|               | HOMO → LUMO+1 (19.3%)   |                       |                     |
|               | HOMO-3 → LUMO (2.8%)    |                       |                     |
|               | HOMO-2 → LUMO+1 (2.6%)  |                       |                     |
| S7            | HOMO-3 → LUMO (46.8%)   | 3.0875 eV (401.57 nm) | 0.0315              |
|               | HOMO → LUMO+1 (1.5%)    |                       |                     |
|               | HOMO-1 → LUMO (1.1%)    |                       |                     |

**Table S4.** Molecular-orbital populations of **2**.

| Molecular Orbital | Eigenvalue / eV | MO Population |            |             |      |                   |
|-------------------|-----------------|---------------|------------|-------------|------|-------------------|
|                   |                 | V             | O(bridged) | O(terminal) | Cl   | Aromatic ring (L) |
| <b>LUMO+3</b>     | -1.287          | 0.56          | 0.14       | 0.12        | 0.00 | 0.11              |
| <b>LUMO+2</b>     | -1.814          | 0.62          | 0.04       | 0.17        | 0.11 | 0.02              |
| <b>LUMO+1</b>     | -3.152          | 0.65          | 0.11       | 0.03        | 0.07 | 0.12              |
| <b>LUMO</b>       | -3.211          | 0.64          | 0.13       | 0.02        | 0.05 | 0.13              |
| <b>HOMO</b>       | -6.313          | 0.08          | 0.11       | 0.01        | 0.05 | 0.64              |
| <b>HOMO-1</b>     | -6.514          | 0.10          | 0.08       | 0.00        | 0.02 | 0.66              |
| <b>HOMO-2</b>     | -6.820          | 0.00          | 0.00       | 0.00        | 0.00 | 0.84              |
| <b>HOMO-3</b>     | -7.022          | 0.00          | 0.00       | 0.00        | 0.00 | 0.80              |

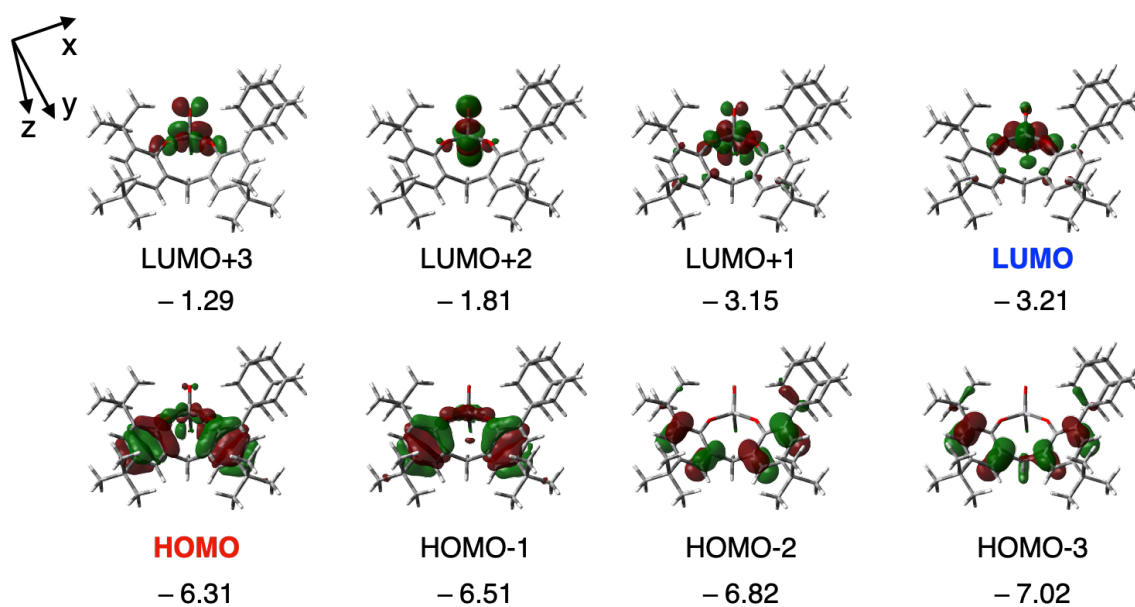

**Fig. S30** Frontier molecular orbitals of **2**.

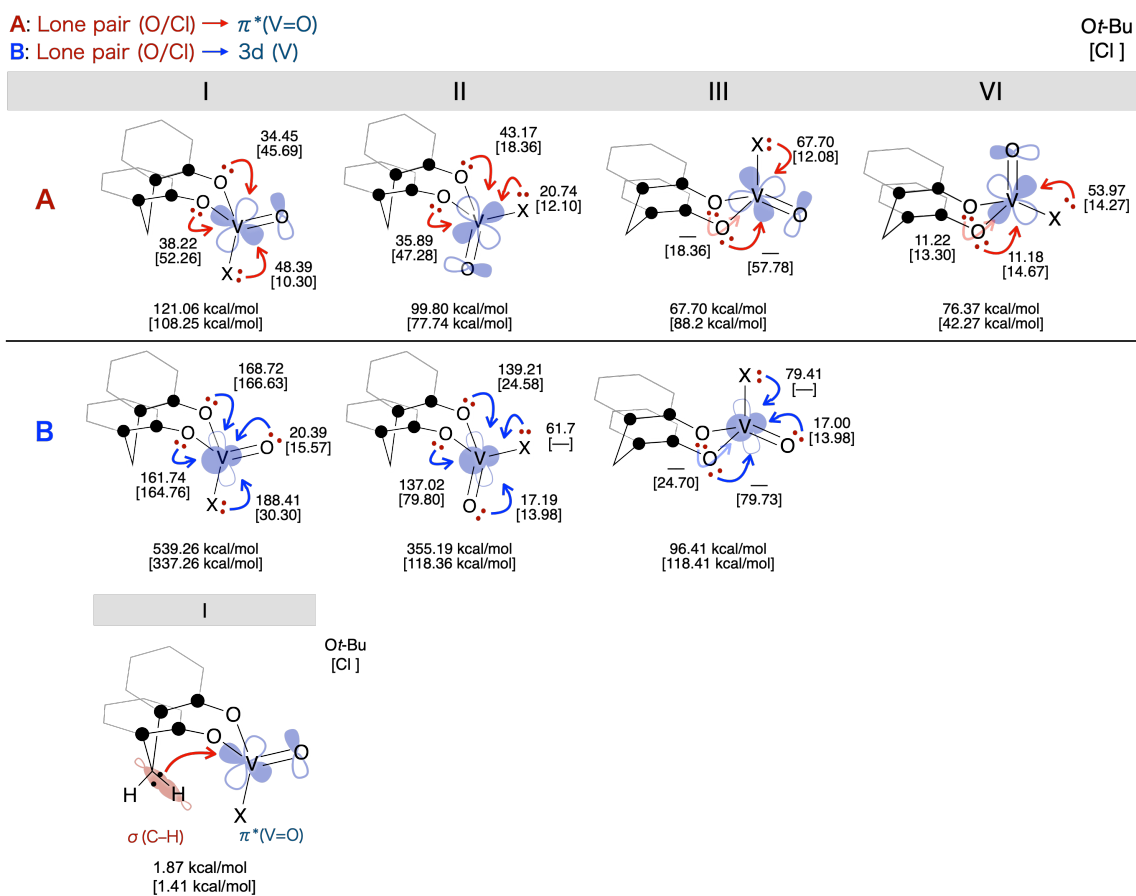

**Fig. S31** Second-order perturbation of I-VI.

**Table S5.** Second-order perturbation of I-VI.

|              |           | I      | II     | III    | VI    |
|--------------|-----------|--------|--------|--------|-------|
| <b>A</b>     | X = Ot-Bu | 121.06 | 99.80  | 67.70  | 76.37 |
|              | X = Cl    | 108.25 | 77.74  | 88.20  | 42.27 |
| <b>B</b>     | X = Ot-Bu | 539.26 | 355.19 | 96.41  |       |
|              | X = Cl    | 337.26 | 118.36 | 118.41 |       |
| <b>A + B</b> | X = Ot-Bu | 660.32 | 454.90 | 164.11 | 76.37 |
|              | X = Cl    | 445.51 | 196.10 | 206.61 | 42.27 |

<sup>a</sup> Calculated at the B3LYP/Def2SVP level of theory. <sup>b</sup> In kcal mol<sup>-1</sup>



**Table S6.** Molecular-orbital populations of **3**.

| Molecular Orbital | Eigenvalue / eV | MO Population |            |             |                   |
|-------------------|-----------------|---------------|------------|-------------|-------------------|
|                   |                 | V             | O(bridged) | O(terminal) | Aromatic ring (L) |
| <b>LUMO+3</b>     | -0.495          | 0.55          | 0.15       | 0.11        | 0.10              |
| <b>LUMO+2</b>     | -1.021          | 0.56          | 0.11       | 0.15        | 0.04              |
| <b>LUMO+1</b>     | -1.328          | 0.61          | 0.16       | 0.05        | 0.08              |
| <b>LUMO</b>       | -2.464          | 0.64          | 0.14       | 0.03        | 0.13              |
| <b>HOMO</b>       | -5.911          | 0.04          | 0.20       | 0.00        | 0.64              |
| <b>HOMO-1</b>     | -6.164          | 0.08          | 0.13       | 0.00        | 0.66              |
| <b>HOMO-2</b>     | -6.542          | 0.00          | 0.00       | 0.00        | 0.89              |
| <b>HOMO-3</b>     | -6.768          | 0.00          | 0.01       | 0.00        | 0.85              |

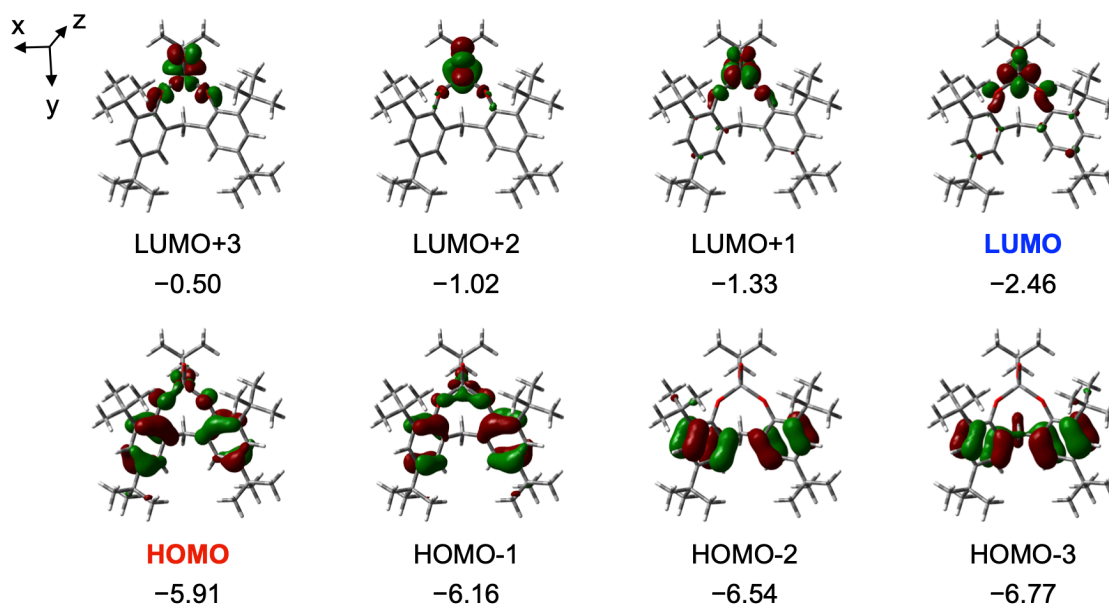

**Fig. S32** Frontier molecular orbitals of **3**.

ATR-IR spectra of 1 and 2

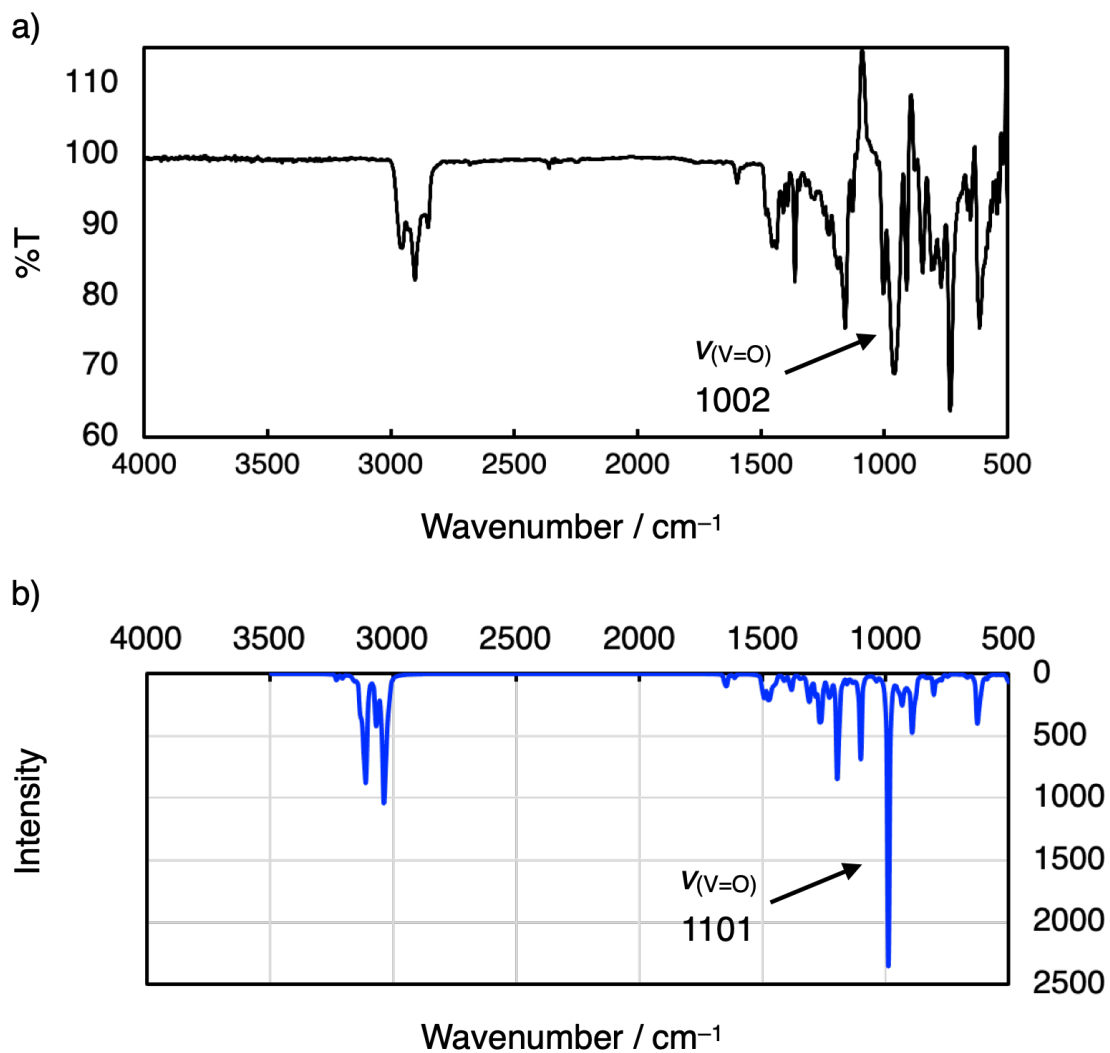

**Fig. S33** a) Solid-state ATR-IR spectrum of [V(O)(Ot-Bu)L]. b) IR spectrum calculated for the [V(O)(Ot-Bu)L] (drawn by using the GaussView 5.0 software, half-width at half-maximum = 4 cm<sup>-1</sup>, without scaling) (B3LYP/Def2SVP).

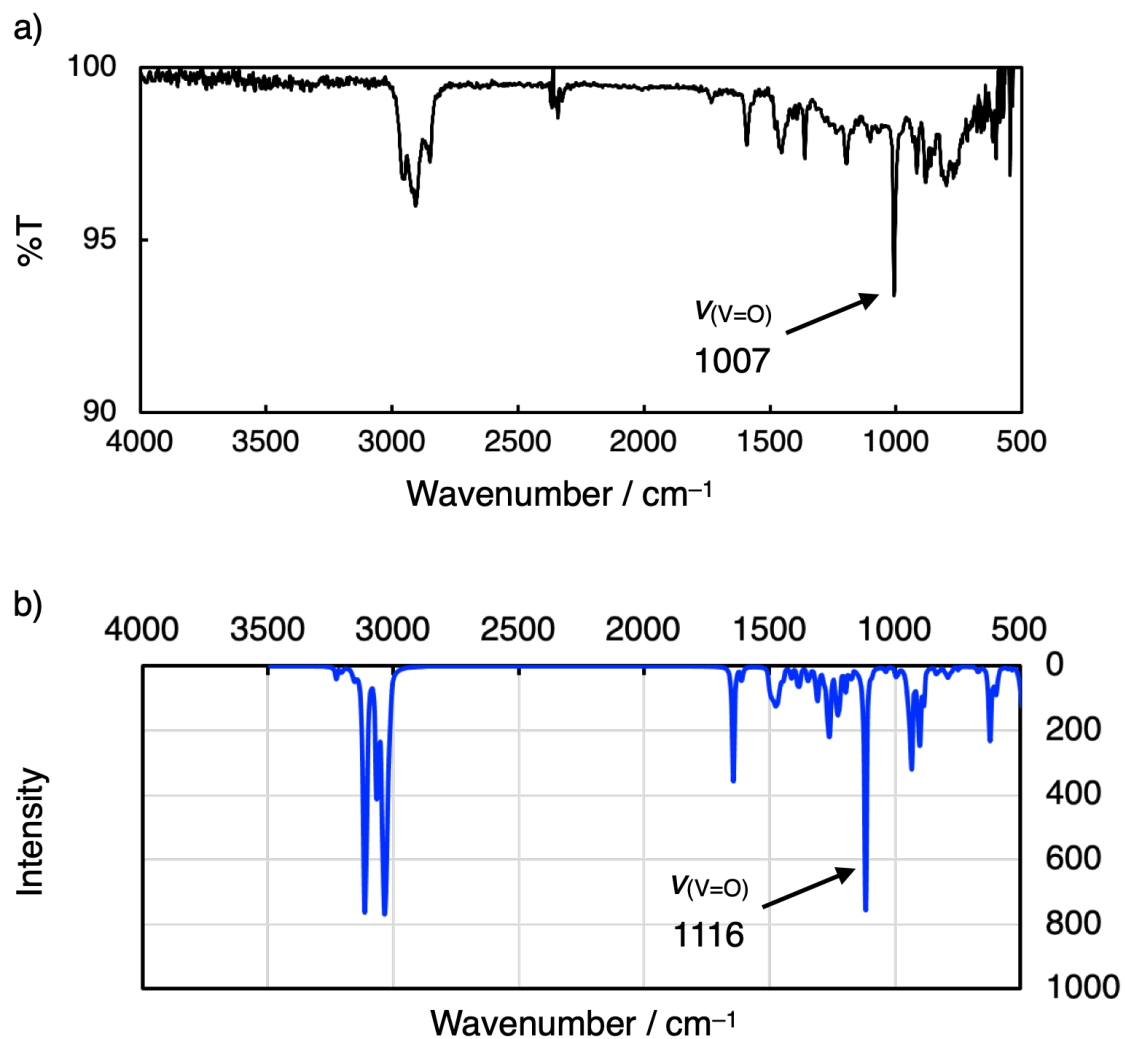

**Fig. S34** a) Solid-state ATR-IR spectrum of [V(O)CIL]. b) IR spectrum calculated for the [V(O)CIL] (drawn by using the GaussView 5.0 software, half-width at half-maximum =  $4 \text{ cm}^{-1}$ , without scaling) (B3LYP/Def2SVP).

### **X-Ray crystallographic analysis of *rac*-[V(O)(*O**t*-Bu)L] (1) and *rac*-[V(O)CIL] (2)**

Single crystals of **1** and **2** were grown by slow evaporation of their solutions (CHCl<sub>3</sub>/*n*-hexane for **1** and benzene for **2**) at room temperature in a nitrogen-filled glovebox. Intensity data were collected on a Rigaku XtaLAB PRO MM007DW PILATUS diffractometer using Cu K $\alpha$  radiation, and the obtained data were calculated with Olex2<sup>S6</sup> 1.2.10 (OlexSys Ltd., 2018) software. The structures were solved with the ShelXT<sup>S7</sup> structure solution program using Intrinsic Phasing or the ShelXL<sup>S8</sup> refinement package using Least Squares minimization. All hydrogens atoms were geometrically arranged and refined using a riding model.

CCDC-2210598 (**1**) and CCDC-2210585 (**2**) contain supplementary crystallographic data for this paper. These data are available free of charge from The Cambridge Crystallographic Data Centre via [www.ccdc.cam.ac.uk/data\\_request/cif](http://www.ccdc.cam.ac.uk/data_request/cif).

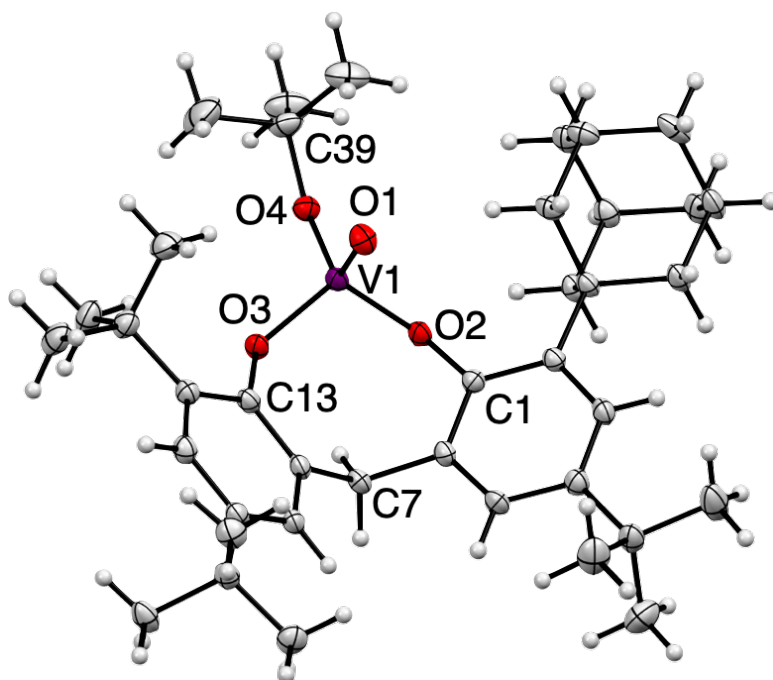

**Fig. S35** Molecular structure of *rac*-[V(O)(*Ot*-Bu)L] (**1**). Thermal displacement ellipsoids are set at the 50% probability level. Selected bond lengths [Å] and angles [°]; V(1)=O(1) 1.5865(10), V(1)–O(2) 1.7902(10), V(1)–O(3) 1.7892(10), V(1)–O(4) 1.7397(10); O(1)–V(1)–O(2) 108.97(5), O(1)–V(1)–O(3) 107.12(5), O(1)–V(1)–O(4) 111.80(5), O(2)–V(1)–O(3) 109.69(4), O(3)–V(1)–O(4) 110.16(5), O(4)–V(1)–O(2) 109.07(5), V(1)–O(2)–C(1) 127.67(5), V(1)–O(3)–C(13) 129.91(5).

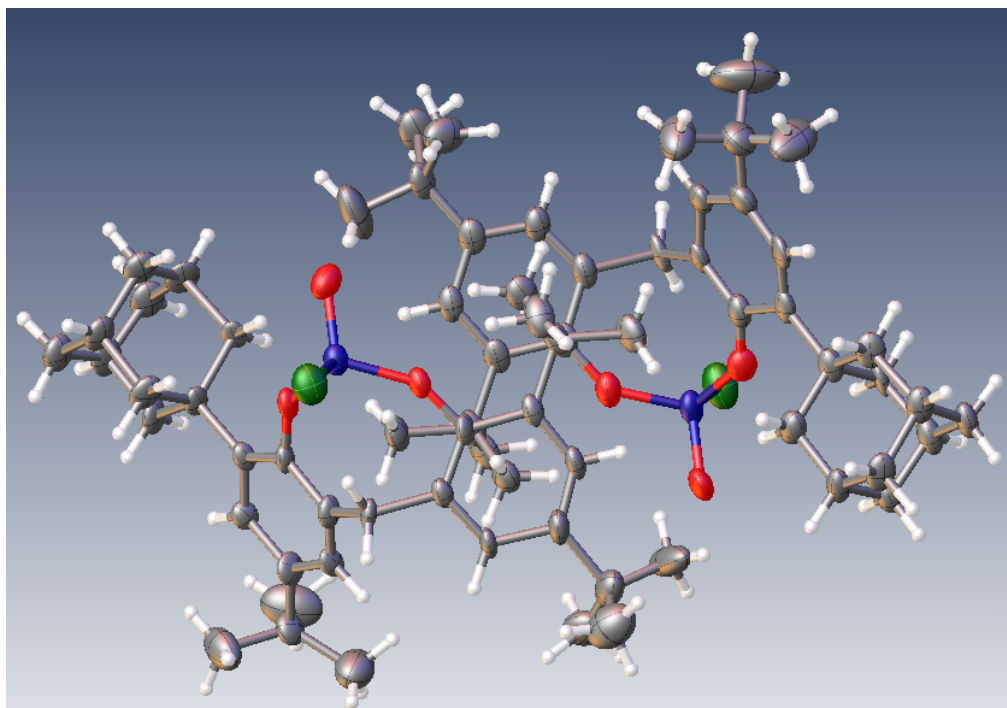

**Fig. S36** Molecular structure of *rac*-[V(O)CIL] (**2**). Thermal displacement ellipsoids are set at the 50% probability level. Two crystallographically independent molecules of **2** were found in the unit cell. Selected bond lengths [Å] and angles [°]; Molecule A: V(1)=O(1) 1.581(10), V(1)–O(2) 1.771(10), V(1)–O(3) 1.744(9), V(1)–Cl(2) 2.167(11); O(1)–V(1)–O(2) 107.9(5), O(1)–V(1)–O(3) 107.0(4), O(1)–V(1)–Cl(2) 107.6(5), O(2)–V(1)–O(3) 109.7(5), O(3)–V(1)–Cl(2) 112.5(5), Cl(2)–V(1)–O(2) 111.8(4), V(1)–O(2)–C(1) 138.9(9), V(1)–O(3)–C(21) 144.8(8); Molecule B: V(2)=O(4) 1.600(11), V(2)–O(5) 1.753(16), V(2)–O(6) 1.764(11), V(2)–Cl(1) 2.202(10); O(4)–V(2)–O(5) 109.6(5), O(4)–V(2)–O(6) 110.8(5), O(4)–V(2)–Cl(1) 109.0(5), O(5)–V(2)–O(6) 107.5(8), O(6)–V(2)–Cl(1) 107.6(5), Cl(1)–V(2)–O(5) 112.2(4), V(2)–O(5)–C(36) 146.1(11), V(2)–O(6)–C(56) 149.9(8).

**Table S7.** Crystal Data for **1** and **2**.

|                                                    | <i>rac</i> -[V(O)( <i>Ot</i> -Bu)L] ( <b>1</b> ) | <i>rac</i> -[V(O)Cil] ( <b>2</b> )                 |
|----------------------------------------------------|--------------------------------------------------|----------------------------------------------------|
| Formula                                            | C <sub>39</sub> H <sub>57</sub> O <sub>4</sub> V | C <sub>35</sub> H <sub>48</sub> ClO <sub>3</sub> V |
| Formula weight                                     | 640.78                                           | 603.12                                             |
| Crystal dimensions/mm <sup>3</sup>                 | 0.05 × 0.05 × 0.1                                | 0.11 × 0.14 × 0.18                                 |
| Temperature/K                                      | 93.15                                            | 93.15                                              |
| Crystal system                                     | triclinic                                        | Orthorhombic                                       |
| Space group                                        | <i>P</i> -1 (#2)                                 | <i>Pmc</i> 2 <sub>1</sub> (#26)                    |
| Lattice parameters                                 |                                                  |                                                    |
| <i>a</i> /Å                                        | 11.3936(3)                                       | 10.4288(2)                                         |
| <i>b</i> /Å                                        | 13.2903(3)                                       | 27.1835(4)                                         |
| <i>c</i> /Å                                        | 13.4060(3)                                       | 11.2290(2)                                         |
| <i>α</i> /deg                                      | 75.111(2)                                        | 90                                                 |
| <i>β</i> /deg                                      | 69.895(2)                                        | 90                                                 |
| <i>γ</i> /deg                                      | 75.358(2)                                        | 90                                                 |
| <i>V</i> /Å <sup>3</sup>                           | 1811.79(8)                                       | 3183.32(10)                                        |
| <i>Z</i>                                           | 2                                                | 4                                                  |
| <i>D</i> <sub>calcd</sub> /g·cm <sup>-3</sup>      | 1.175                                            | 1.258                                              |
| <i>μ</i> /mm <sup>-1</sup>                         | 2.568                                            | 3.623                                              |
| <i>θ</i> /deg                                      | 6.998 to 146.834                                 | 6.504 to 144.2                                     |
| No. of reflections                                 | 17500                                            | 35727                                              |
| Independent reflections                            | 7043                                             | 5925                                               |
| <i>R</i> <sub>int</sub>                            | 0.0241                                           | 0.0384                                             |
| Completeness to <i>θ</i> %                         | 99.4                                             | 100                                                |
| <i>R</i> <sub>1</sub> [ <i>I</i> > 2σ( <i>I</i> )] | 0.0337                                           | 0.0712                                             |
| w <i>R</i> <sub>2</sub> (all data)                 | 0.0922                                           | 0.2112                                             |
| Largest diff. peak/e·Å <sup>-3</sup>               | 0.26                                             | 0.55                                               |
| Largest diff. hole/e·Å <sup>-3</sup>               | -0.39                                            | -0.70                                              |
| Goodness-of-fit on <i>F</i> <sup>2</sup>           | 1.082                                            | 1.065                                              |

## References

- (S1) M. J. Frisch, G. W. Trucks, H. B. Schlegel, G. E. Scuseria, M. A. Robb, J. R. Cheeseman, G. Scalmani, V. Barone, G. A. Petersson, H. Nakatsuji, X. Li, M. Caricato, A. V. Marenich, J. Bloino, B. G. Janesko, R. Gomperts, B. Mennucci, H. P. Hratchian, J. V. Ortiz, A. F. Izmaylov, J. L. Sonnenberg, D. Williams-Young, F. Ding, F. Lipparini, F. Egidi, J. Goings, B. Peng, A. Petrone, T. Henderson, D. Ranasinghe, V. G. Zakrzewski, J. Gao, N. Rega, G. Zheng, W. Liang, M. Hada, M. Ehara, K. Toyota, R. Fukuda, J. Hasegawa, M. Ishida, T. Nakajima, Y. Honda, O. Kitao, H. Nakai, T. Vreven, K. Throssell, J. A. Montgomery, Jr., J. E. Peralta, F. Ogliaro, M. J. Bearpark, J. J. Heyd, E. N. Brothers, K. N. Kudin, V. N. Staroverov, T. A. Keith, R. Kobayashi, J. Normand, K. Raghavachari, A. P. Rendell, J. C. Burant, S. S. Iyengar, J. Tomasi, M. Cossi, J. M. Millam, M. Klene, C. Adamo, R. Cammi, J. W. Ochterski, R. L. Martin, K. Morokuma, O. Farkas, J. B. Foresman and D. J. Fox, Gaussian, Inc., Wallingford CT, 2016.
- (S2) S. Grimme, *J. Chem. Phys.*, 2006, **124**, 034108.
- (S3) F. Weigend and R. Ahlrichs, *Phys. Chem. Chem. Phys.*, 2005, **7**, 3297-3305.
- (S4) A. V. Marenich, C. J. Cramer and D. G. Truhlar, *J. Phys. Chem. B*, 2009, **113**, 6378-6396.
- (S5) E. D. Glendening, J. K. Badenhoop, A. E. Reed, J. E. Carpenter, J. A. Bohmann, C. M. Morales and F. Weinhold, NBO 5.0, Theoretical Chemistry Institute, University of Wisconsin, Madison, WI, 2001.
- (S6) O. V. Dolomanov, L. J. Bourhis, R. J. Gildea, J. A. K. Howard and H. Puschmann, *J. Appl. Cryst.* 2009, **42**, 339.
- (S7) G. M. Sheldrick, *Acta Cryst.* 2015, **A71**, 3.
- (S8) G. M. Sheldrick, *Acta Cryst.* 2015, **C71**, 3.
